# Supplementary material
Source: PubMed Central journal article supplement (PMC2753596)
Supplement: NIHMS104937-supplement-1_si_001.pdf [file NIHMS104937-supplement-1_si_001.pdf]

# Loosening and Reorganization of Fluid Phospholipid Bilayers by Chloroform

Serhan Turkyilmaz, Wen-Hua Chen, Hideyuki Mitomo and Steven L. Regen  
*Department of Chemistry, Lehigh University, Bethlehem, Pennsylvania 18015*

## Supporting Information

### 1. Nearest Neighbor Recognition (NNR) Experiments

#### 1.1. Methods

##### 1.1.1. Preparation of Liposomal Dispersions

The liposomes (large unilamellar vesicles, LUVs) used in all NNR experiments consisted of 97.5 mol % DPPC/cholesterol and 2.5 mol % of either exchangeable homodimers **AA** and **BB** (at a 1:1 mol ratio, henceforth **AA** will be referred to as {16-16} and **BB** will be referred to as {Ch-Ch}) or 2.5 mol % exchangeable homodimer **AB** (henceforth **AB** will be referred to as {Ch-16}). The molecular structures of these lipids are given in Figure SI-1. All of the LUVs having 2.5, 20, 32, and 40 mol % sterol have been prepared using the method detailed below:

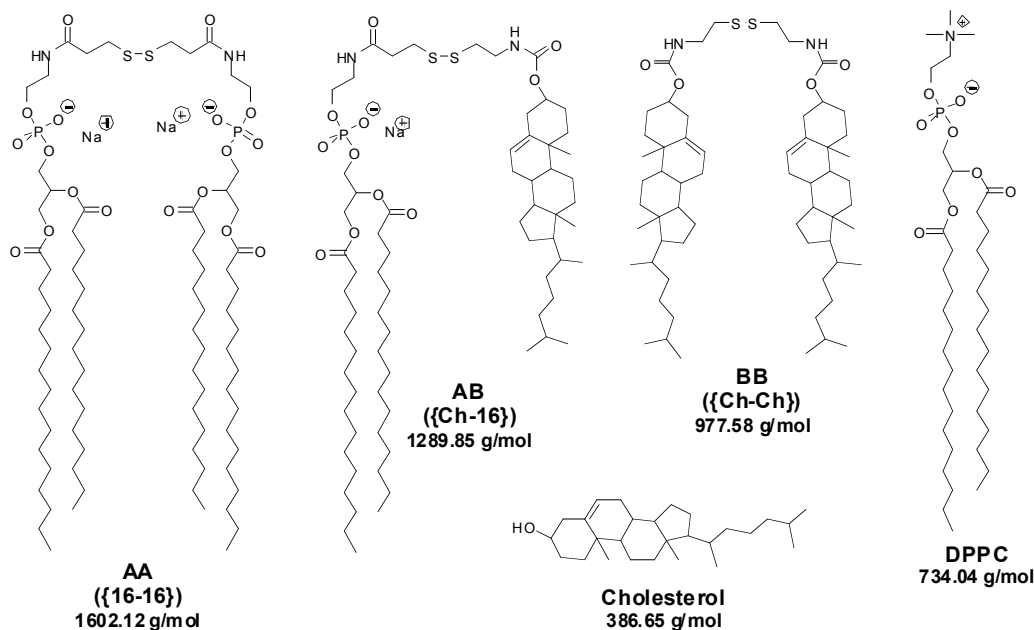

Figure SI-1: Lipids used in NNR experiments.

The amounts of lipids (as stock solutions in  $\text{CHCl}_3$ ) given in Table SI-1 were used for film preparation. The given volumes of stock solutions were placed in a 13 x 100 mm test tube (VWR, P.N.: 47729-572), and ~300  $\mu\text{l}$  MeOH was added to the solutions. The solvent was evaporated under a stream of Argon while the test tube was rapidly rotated at an angle of approximately  $10^\circ$  with respect to a flat horizontal surface at  $\sim 30^\circ\text{C}$ . A thin film was obtained which covered the inner surface of the test tube up to 1/2 of the height of the tube. A silicone septum was used to seal the mouth of the tube and the tube was wrapped with aluminum foil. The assembly was connected to a vacuum pump via a needle and kept under vacuum ( $\sim 0.2$  torr) overnight ( $\sim 14$  h).

**Table SI-1:** Lipids used in film preparation for NNR experiments.

|                    | 2.5 % Sterol         |                      | 20 % Sterol          |                      | 32 % Sterol          |                      | 40 % Sterol          |                      |
|--------------------|----------------------|----------------------|----------------------|----------------------|----------------------|----------------------|----------------------|----------------------|
|                    | Hetero               | Homo                 | Hetero               | Homo                 | Hetero               | Homo                 | Hetero               | Homo                 |
| <b>{16-16}</b>     | -                    | 110 $\mu\text{l}$    |
| <b>1.37 mM</b>     |                      | 0.15 $\mu\text{mol}$ |                      | 0.15 $\mu\text{mol}$ |                      | 0.15 $\mu\text{mol}$ |                      | 0.15 $\mu\text{mol}$ |
| <b>{Ch-16}</b>     | 221 $\mu\text{l}$    | -                    |
| <b>1.36 mM</b>     | 0.3 $\mu\text{mol}$  |                      | 0.3 $\mu\text{mol}$  |                      | 0.3 $\mu\text{mol}$  |                      | 0.3 $\mu\text{mol}$  |                      |
| <b>{Ch-Ch}</b>     | -                    | 103 $\mu\text{l}$    |
| <b>1.46 mM</b>     |                      | 0.15 $\mu\text{mol}$ |                      | 0.15 $\mu\text{mol}$ |                      | 0.15 $\mu\text{mol}$ |                      | 0.15 $\mu\text{mol}$ |
| <b>DPPC</b>        | 430 $\mu\text{l}$    | 430 $\mu\text{l}$    | 351 $\mu\text{l}$    | 351 $\mu\text{l}$    | 305 $\mu\text{l}$    | 305 $\mu\text{l}$    | 261 $\mu\text{l}$    | 261 $\mu\text{l}$    |
| <b>27.2 mM</b>     | 11.7 $\mu\text{mol}$ | 11.7 $\mu\text{mol}$ | 9.54 $\mu\text{mol}$ | 9.54 $\mu\text{mol}$ | 8.31 $\mu\text{mol}$ | 8.31 $\mu\text{mol}$ | 7.08 $\mu\text{mol}$ | 7.08 $\mu\text{mol}$ |
| <b>Cholesterol</b> | -                    | -                    | 108 $\mu\text{l}$    | 108 $\mu\text{l}$    | 185 $\mu\text{l}$    | 185 $\mu\text{l}$    | 231 $\mu\text{l}$    | 231 $\mu\text{l}$    |
| <b>20.0 mM</b>     |                      |                      | 2.16 $\mu\text{mol}$ | 2.16 $\mu\text{mol}$ | 3.69 $\mu\text{mol}$ | 3.69 $\mu\text{mol}$ | 4.62 $\mu\text{mol}$ | 4.62 $\mu\text{mol}$ |

The lipid film was hydrated with 2 ml Tris-HCl buffer (10 mM Tris, 150 mM NaCl, 2 mM  $\text{NaN}_3$ , 1 mM EDTA, pH = 7.4) at  $60^\circ\text{C}$  and the mixture was vortexed for 30 s. The mixture was then incubated for 5 min in a  $60^\circ\text{C}$  water bath. The mixture was again vortexed for 30 s followed by a 30 min incubation in a  $60^\circ\text{C}$  water bath. The mixture was then subjected to six freeze/thaw cycles as follows: The test tube was repeatedly immersed in liquid  $\text{N}_2$  and then vortexed until a homogeneous thin layer of ice covered the inner surface of the tube. When all of the liquid was frozen the tube was immersed in liquid  $\text{N}_2$  until rapid bubble evolution ( $\text{N}_2$ ) in the bath ceased. The tube was then immersed in a  $60^\circ\text{C}$  water bath until the frozen multilamellar vesicle (MLV) mixture melted and heated to  $60^\circ\text{C}$ . This freeze/thaw cycle was repeated five more times. The MLVs were then extruded using a Lipex extruder with an argon pressure of 100 psi. Extrusion was done at  $60^\circ\text{C}$ . The MLVs were extruded 20 times through 0.2  $\mu\text{m}$  polycarbonate filters.

### 1.1.2. Thiolate-Disulfide Exchange Reactions

Thiolate-disulfide exchange reactions were carried out for 2.5, 20, 32, and 40 mol % sterol containing LUVs. For each sterol concentration thiolate-disulfide exchange reactions were done both from the heterodimer side and the homodimer side in the presence and absence of  $\text{CHCl}_3$ . Each reaction was done at least twice. Thus for any given sterol concentration at least eight reactions were performed.

For liquid phase NNR reactions typically 120  $\mu\text{l}$  of 0.84  $\mu\text{M}$  Monensin was added to a 2 ml LUV dispersion. Then, 100  $\mu\text{l}$  of this dispersion was withdrawn and added to 10  $\mu\text{l}$  AcOH/ $\text{H}_2\text{O}$  (1/1, v/v) in a 10 x 75 mm test tube (VWR, P.N.: 60825-402). The tube was rapidly vortexed and the contents were frozen using liquid nitrogen. This was saved as the sample for  $t = 0$  min. A 50  $\mu\text{l}$  aliquot was removed and used for dynamic light scattering (DLS) analysis (see section 1.3.). The remaining dispersion was divided into two portions (950-1000  $\mu\text{l}$  each) and placed into reaction vessels (Wheaton V-Vial, 3 ml volume, PN: 986287) equipped with a small magnetic stir bar and capped with a serrated silicone septum (Aldrich, PN: Z512893). For reactions involving  $\text{CHCl}_3$  a small test tube (Fisher, P.N.: 14-958A, 0.6 x 50 mm, cut to a height of 26 mm) was also placed in the reaction vessel (Figure SI-2). These reaction vessels were heated to  $45^\circ\text{C}$  and degassed by bubbling Ar through them for 10 min. The argon and bubbler lines were removed and for the reaction involving  $\text{CHCl}_3$  250  $\mu\text{l}$   $\text{CHCl}_3$  was added into the small test tube within the

reaction vessel. Then, 21  $\mu\text{l}$  of 0.1 M NaOH was added to each dispersion to bring the pH to 7.4 at 45  $^{\circ}\text{C}$ . Thiolate-disulfide exchange was initiated by adding a given volume of 10 mM DTT solution (in Tris buffer) to the reaction. The amount of DTT added (equivalents with respect to exchangeable dimer) depended on the sterol content of the LUVs: 0.8 equivalents for 40 %, 1.2 equivalents for 32 %, 1.2 equivalents for 20 %, and 1.6 equivalents for 2.5 % sterol containing LUVs. An additional 200  $\mu\text{l}$  of  $\text{CHCl}_3$  was added to the appropriate vessel six hours after the reactions started. The reactions were allowed to proceed at 45  $^{\circ}\text{C}$  for a total of 12 hours after which a 50  $\mu\text{l}$  aliquot was removed and used for DLS analysis (see section 1.3.). The exchange reactions were stopped by adding 100  $\mu\text{l}$  of  $\text{AcOH}/\text{H}_2\text{O}$  (1/1, v/v) to each reaction vessel. Four 225  $\mu\text{l}$  aliquots were then withdrawn from each reaction vessel, placed in 10 x 75 mm test tubes (VWR, P.N.: 60825-402), and frozen with liquid  $\text{N}_2$ .

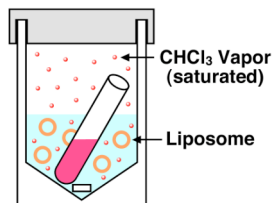

**Figure SI-2:** Reaction vessel for thiolate-disulfide exchange reactions involving  $\text{CHCl}_3$ .

One set of NNR experiments was carried out in the gel phase for 2.5 mol % sterol membranes. These NNR reactions were performed in a manner similar to above, but the reaction temperature was kept at 35  $^{\circ}\text{C}$  and 0.8 equivalents of DTT (with respect to exchangeable lipid dimers) was used. Gel phase reactions were much slower and needed longer times (24-72 h) to equilibrate.

### 1.1.3. Determination of Vesicle Size by Dynamic Light Scattering

The effect of the exchange reaction and  $\text{CHCl}_3$  on vesicle size was investigated using a Nicomp Model 270 Submicron Particle Sizer. Typically, 50  $\mu\text{l}$  aliquots were taken from each vessel before and after the exchange reaction (in the presence or absence of  $\text{CHCl}_3$ ). These aliquots were diluted with 300  $\mu\text{l}$  of Tris buffer (pH = 7.4) and analyzed at 45  $^{\circ}\text{C}$  assuming a sample viscosity of 0.5960 centipoise. The photopulse rate was adjusted to ~300 kHz. Vesicle size was evaluated through Gaussian analysis.

### 1.1.4. HPLC Analysis

#### 1.1.4.1. Chromatographic System

A determination of the dimer content was made by HPLC analysis using a 5  $\mu\text{m}$ , 80  $\text{\AA}$ , 4.6 x 250 mm Ultrasphere ODS C18 column (Beckman-Coulter) and a Waters Breeze HPLC system consisting of a Waters 717plus Autosampler, Waters 1515 Binary Pump, and Waters 2187 Dual  $\lambda$  Absorbance Detector. The column was placed in an oven (Waters Column Heater Module, SN: CHM008075 controlled through a Waters 2410 refractive index detector) and the temperature was maintained at 31  $^{\circ}\text{C}$ . The analysis was done in isocratic mode using a mobile phase consisting of 760 ml of EtOH, 120 ml of deionized  $\text{H}_2\text{O}$ , 100 ml of hexane, and 10 ml 1 M *aq.*  $\text{Bu}_4\text{NOAc}$ . The flow-rate was 0.9 ml/min and detection was done at 203 nm. The peaks were manually integrated. For a representative chromatogram see Figure SI-3.

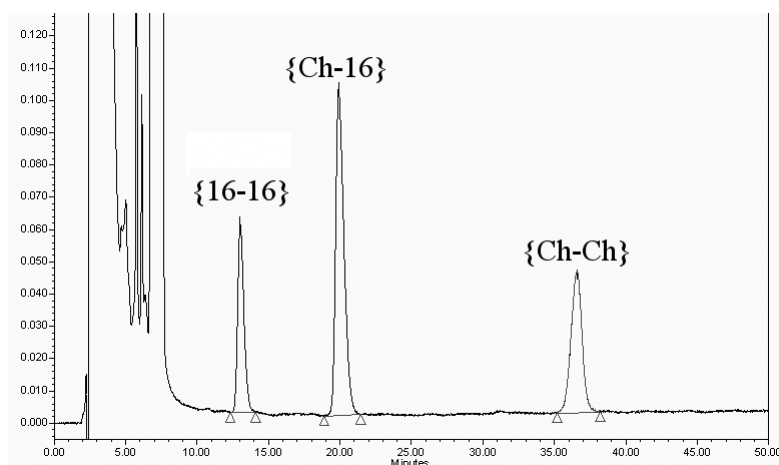

Figure SI-3: A sample chromatogram.

#### 1.1.4.2. Calibration of the Chromatographic System

The chromatographic system was calibrated and the system was found to respond as follows: i. For {16-16}  $Signal = 478140 \times n_{\{16-16\}} - 518$  ( $R^2 = 0.9984$ ); ii. For {Ch-16}  $Signal = 533520 \times n_{\{Ch-16\}} - 12634$  ( $R^2 = 0.9988$ ); iii. For {Ch-Ch}  $Signal = 591890 \times n_{\{Ch-Ch\}} + 90867$  ( $R^2 = 0.9988$ ). Calibration data are given in Table SI-2 and the calibration graph is reproduced in Figure SI-4.

Table SI-2: Calibration data for the chromatographic system

| {16-16} |          |         | {Ch-16} |          |         | {Ch-Ch} |          |         |
|---------|----------|---------|---------|----------|---------|---------|----------|---------|
| #       | N (nmol) | Area    | #       | N (nmol) | Area    | #       | N (nmol) | Area    |
| 1       | 1.37     | 625466  | 20      | 1.51     | 816433  | 38      | 1.49     | 940206  |
| 2       | 1.37     | 659662  | 21      | 1.51     | 803229  | 39      | 1.49     | 962204  |
| 3       | 1.37     | 644010  | 22      | 1.51     | 807251  | 40      | 2.98     | 1844004 |
| 4       | 2.74     | 1292293 | 23      | 3.02     | 1639721 | 41      | 2.98     | 1844319 |
| 5       | 2.74     | 1292591 | 24      | 3.02     | 1620989 | 42      | 4.47     | 2721145 |
| 6       | 2.74     | 1355413 | 25      | 3.02     | 1528560 | 43      | 4.47     | 2804604 |
| 7       | 4.11     | 1947551 | 26      | 4.53     | 2402247 | 44      | 5.96     | 3702264 |
| 8       | 4.11     | 1970380 | 27      | 4.53     | 2402983 | 45      | 5.96     | 3717866 |
| 9       | 4.11     | 1987015 | 28      | 4.53     | 2405859 | 46      | 8.94     | 5153003 |
| 10      | 5.48     | 2577517 | 29      | 6.04     | 3293724 | 47      | 8.94     | 5384288 |
| 11      | 5.48     | 2550765 | 30      | 6.04     | 3125143 | 48      | 14.90    | 8834895 |
| 12      | 5.48     | 2668974 | 31      | 6.04     | 3146901 | 49      | 14.90    | 9041042 |
| 13      | 8.22     | 3958951 | 32      | 9.04     | 4822184 |         |          |         |
| 14      | 8.22     | 4084058 | 33      | 9.06     | 5004200 |         |          |         |
| 15      | 8.22     | 3873902 | 34      | 9.06     | 4629127 |         |          |         |
| 16      | 13.70    | 6549891 | 35      | 15.10    | 7910375 |         |          |         |
| 17      | 13.70    | 6336164 | 36      | 15.10    | 8122740 |         |          |         |
| 18      | 13.70    | 6709740 | 37      | 15.10    | 8117872 |         |          |         |

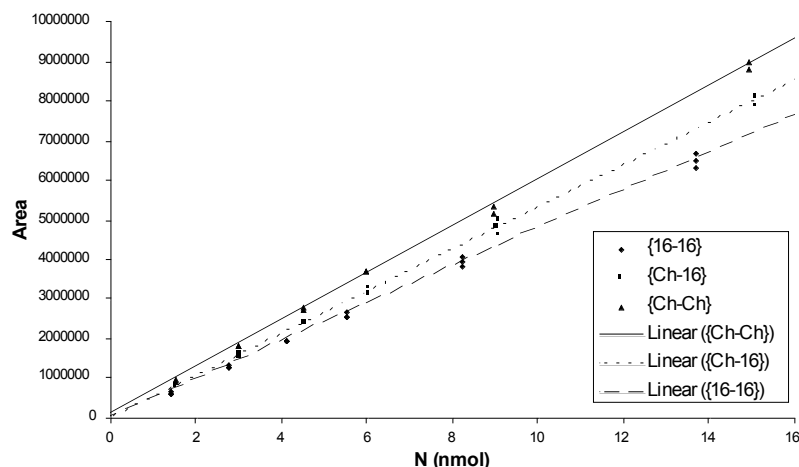

**Figure SI-4:** Calibration graph for this chromatographic system.

#### 1.1.4.3. HPLC Analysis of Thiolate-Disulfide Exchange Reaction Products

To each sample obtained at the end of section 1.1.2. was added 1000  $\mu$ l of  $\text{CHCl}_3/\text{MeOH}$  (2/1, v/v), the tubes were vortexed, centrifuged, and the aqueous phases removed using Pasteur pipettes. The organic solvents were removed using a Savant SVC-100 SpeedVac concentrator equipped with a cold trap and vacuum pump ( $\sim 1$  hr at  $\sim 0.4$  torr). The remaining lipids were dissolved in 20  $\mu$ l  $\text{CHCl}_3$  and 80  $\mu$ l HPLC eluent. Typically, 75  $\mu$ l injections were done for each sample.

## 1.2. Results

### 1.2.1. Vesicle Size

**Table SI-3:** Mean vesicle diameters from DLS measurements using Gaussian analysis.

| % Sterol | M e a n   D i a m e t e r   ( n m ) |            |                                        |            |                                     |            |
|----------|-------------------------------------|------------|----------------------------------------|------------|-------------------------------------|------------|
|          | Before Reaction                     |            | After Reaction without $\text{CHCl}_3$ |            | After Reaction with $\text{CHCl}_3$ |            |
|          | Hetero                              | Homo       | Hetero                                 | Homo       | Hetero                              | Homo       |
| 2.5      | 180.0                               | 165.5      | 178.8                                  | 167.1      | 194.5                               | 176.3      |
|          | $\pm 50.4$                          | $\pm 51.3$ | $\pm 57.2$                             | $\pm 51.8$ | $\pm 52.5$                          | $\pm 58.2$ |
| 20       | 194.1                               | 181.7      | 208.3                                  | 183.1      | 210.0                               | 198.7      |
|          | $\pm 69.9$                          | $\pm 61.8$ | $\pm 83.3$                             | $\pm 60.4$ | $\pm 73.5$                          | $\pm 43.7$ |
| 32       | 211.2                               | 165.7      | 202.0                                  | 181.4      | 210.3                               | 190.9      |
|          | $\pm 76.0$                          | $\pm 54.4$ | $\pm 72.7$                             | $\pm 66.6$ | $\pm 67.3$                          | $\pm 44.7$ |
| 40       | 195.3                               | 200.4      | 201.5                                  | 197.6      | 193.0                               | 193.9      |
|          | $\pm 66.4$                          | $\pm 66.1$ | $\pm 74.6$                             | $\pm 63.2$ | $\pm 67.6$                          | $\pm 62.0$ |

### 1.2.2. *K* Values

**Table SI-4:** Summary of *K* values for this study.

| Entry | % Sterol | T (°C) | <i>K</i> (without CHCl <sub>3</sub> ) | <i>K</i> (with CHCl <sub>3</sub> ) |
|-------|----------|--------|---------------------------------------|------------------------------------|
| 1     | 2.5      | 45     | 3.45 ± 0.66                           | 5.80 ± 0.35                        |
| 2     | 20       | 45     | 4.21 ± 0.24                           | 5.94 ± 0.27                        |
| 3     | 32       | 45     | 7.80 ± 0.43                           | 6.06 ± 0.11                        |
| 4     | 40       | 45     | 9.02 ± 0.48                           | 5.97 ± 0.22                        |
| 5     | 2.5      | 35     | 0.78 ± 0.03                           | 5.26 ± 0.09                        |

#### 1.2.2.1. *K* values for 2.5 mol % Sterol LUVs at 45 °C

**Table SI-5:** *K* values for heterodimer equilibration # 1 in 2.5 mol % sterol LUVs in the absence of CHCl<sub>3</sub>. The reaction was carried out at 45 °C.

| Sample # | Time (min) | Dimer   | t <sub>R</sub> (min) | Area    | N (nmols) | <i>K</i> |
|----------|------------|---------|----------------------|---------|-----------|----------|
| 1        | 720        | {16-16} | 13.16                | 1482502 | 3.10      | 3.82     |
|          |            | {Ch-16} | 20.16                | 3214958 | 6.05      |          |
|          |            | {Ch-Ch} | 36.89                | 1920709 | 3.09      |          |
| 2        | 720        | {16-16} | 13.18                | 1577429 | 3.30      | 3.94     |
|          |            | {Ch-16} | 20.19                | 3450280 | 6.49      |          |
|          |            | {Ch-Ch} | 36.96                | 2007013 | 3.24      |          |
| 3        | 720        | {16-16} | 13.17                | 1611076 | 3.37      | 3.96     |
|          |            | {Ch-16} | 20.15                | 3524892 | 6.63      |          |
|          |            | {Ch-Ch} | 36.88                | 2040211 | 3.29      |          |
| 4        | 720        | {16-16} | 13.16                | 1564821 | 3.27      | 3.91     |
|          |            | {Ch-16} | 20.16                | 3421696 | 6.44      |          |
|          |            | {Ch-Ch} | 36.90                | 2005101 | 3.23      |          |

**Table SI-6:** *K* values for heterodimer equilibration # 1 in 2.5 mol % sterol LUVs in the presence of CHCl<sub>3</sub>. The reaction was carried out at 45 °C.

| Sample # | Time (min) | Dimer   | t <sub>R</sub> (min) | Area    | N (nmols) | <i>K</i> |
|----------|------------|---------|----------------------|---------|-----------|----------|
| 1        | 720        | {16-16} | 13.26                | 712903  | 1.49      | 6.04     |
|          |            | {Ch-16} | 20.32                | 1863807 | 3.52      |          |
|          |            | {Ch-Ch} | 36.91                | 903788  | 1.37      |          |
| 2        | 720        | {16-16} | 13.31                | 744934  | 1.56      | 6.08     |
|          |            | {Ch-16} | 20.39                | 1971021 | 3.72      |          |
|          |            | {Ch-Ch} | 37.02                | 953581  | 1.46      |          |
| 3        | 720        | {16-16} | 13.33                | 727929  | 1.52      | 6.17     |
|          |            | {Ch-16} | 20.42                | 1928755 | 3.64      |          |
|          |            | {Ch-Ch} | 37.30                | 923982  | 1.41      |          |
| 4        | 720        | {16-16} | 13.41                | 679468  | 1.42      | 6.31     |
|          |            | {Ch-16} | 20.51                | 1807467 | 3.41      |          |
|          |            | {Ch-Ch} | 37.16                | 858042  | 1.30      |          |

**Table SI-7:** *K* values for heterodimer equilibration # 2 in 2.5 mol % sterol LUVs in the absence of CHCl<sub>3</sub>. The reaction was carried out at 45 °C.

| Sample # | Time (min) | Dimer   | t <sub>R</sub> (min) | Area    | N (nmols) | <i>K</i> |
|----------|------------|---------|----------------------|---------|-----------|----------|
| 1        | 720        | {16-16} | 13.02                | 1441318 | 3.02      | 5.16     |
|          |            | {Ch-16} | 19.80                | 3545486 | 6.67      |          |
|          |            | {Ch-Ch} | 35.04                | 1781905 | 2.86      |          |
| 2        | 720        | {16-16} | 13.04                | 1374531 | 2.88      | 3.71     |
|          |            | {Ch-16} | 19.58                | 2867855 | 5.40      |          |
|          |            | {Ch-Ch} | 34.75                | 1706540 | 2.73      |          |
| 3        | 720        | {16-16} | 13.31                | 1370471 | 2.87      | 3.79     |
|          |            | {Ch-16} | 19.94                | 2884254 | 5.43      |          |
|          |            | {Ch-Ch} | 35.24                | 1695573 | 2.71      |          |
| 4        | 720        | {16-16} | 13.51                | 1426976 | 2.99      | 3.79     |
|          |            | {Ch-16} | 20.29                | 2974946 | 5.60      |          |
|          |            | {Ch-Ch} | 35.84                | 1731705 | 2.77      |          |

**Table SI-8:** *K* values for heterodimer equilibration # 2 in 2.5 mol % sterol LUVs in the presence of CHCl<sub>3</sub>. The reaction was carried out at 45 °C.

| Sample # | Time (min) | Dimer   | t <sub>R</sub> (min) | Area    | N (nmols) | <i>K</i> |
|----------|------------|---------|----------------------|---------|-----------|----------|
| 1        | 720        | {16-16} | 12.95                | 552468  | 1.16      | 5.73     |
|          |            | {Ch-16} | 19.43                | 1358671 | 2.57      |          |
|          |            | {Ch-Ch} | 34.37                | 681150  | 1.00      |          |
| 2        | 720        | {16-16} | 13.27                | 551632  | 1.15      | 6.11     |
|          |            | {Ch-16} | 19.86                | 1330788 | 2.52      |          |
|          |            | {Ch-Ch} | 34.85                | 622650  | 0.90      |          |
| 3        | 720        | {16-16} | 13.34                | 550001  | 1.15      | 5.91     |
|          |            | {Ch-16} | 20.02                | 1328483 | 2.51      |          |
|          |            | {Ch-Ch} | 35.19                | 640140  | 0.93      |          |
| 4        | 720        | {16-16} | 13.72                | 567344  | 1.19      | 5.98     |
|          |            | {Ch-16} | 20.64                | 1349842 | 2.55      |          |
|          |            | {Ch-Ch} | 36.05                | 634444  | 0.92      |          |

**Table SI-9:** *K* values for homodimer equilibration # 1 in 2.5 mol % sterol LUVs in the absence of CHCl<sub>3</sub>. The reaction was carried out at 45 °C.

| Sample # | Time (min) | Dimer   | t <sub>R</sub> (min) | Area    | N (nmols) | <i>K</i> |
|----------|------------|---------|----------------------|---------|-----------|----------|
| 1        | 720        | {16-16} | 12.90                | 1383132 | 2.89      | 2.86     |
|          |            | {Ch-16} | 19.41                | 2493696 | 4.70      |          |
|          |            | {Ch-Ch} | 34.43                | 1670228 | 2.67      |          |
| 2        | 720        | {16-16} | 13.11                | 1357872 | 2.84      | 2.97     |
|          |            | {Ch-16} | 19.74                | 2478667 | 4.67      |          |
|          |            | {Ch-Ch} | 34.96                | 1618343 | 2.58      |          |
| 3        | 720        | {16-16} | 13.35                | 1386333 | 2.90      | 2.83     |
|          |            | {Ch-16} | 20.09                | 2475879 | 4.66      |          |
|          |            | {Ch-Ch} | 35.45                | 1661722 | 2.65      |          |
| 4        | 720        | {16-16} | 13.85                | 1382674 | 2.89      | 2.87     |
|          |            | {Ch-16} | 20.90                | 2469979 | 4.65      |          |
|          |            | {Ch-Ch} | 36.66                | 1632927 | 2.61      |          |

**Table SI-10:** *K* values for homodimer equilibration # 1 in 2.5 mol % sterol LUVs in the presence of  $\text{CHCl}_3$ . The reaction was carried out at 45 °C.

| Sample # | Time (min) | Dimer   | $t_R$ (min) | Area    | N (nmols) | <i>K</i> |
|----------|------------|---------|-------------|---------|-----------|----------|
| 1        | 720        | {16-16} | 13.05       | 590947  | 1.24      | 4.88     |
|          |            | {Ch-16} | 19.62       | 1346779 | 2.55      |          |
|          |            | {Ch-Ch} | 34.60       | 727463  | 1.08      |          |
| 2        | 720        | {16-16} | 13.53       | 635594  | 1.33      | 5.45     |
|          |            | {Ch-16} | 20.17       | 1446993 | 2.74      |          |
|          |            | {Ch-Ch} | 35.27       | 701970  | 1.03      |          |
| 3        | 720        | {16-16} | 13.54       | 566900  | 1.19      | 5.61     |
|          |            | {Ch-16} | 20.32       | 1312841 | 2.48      |          |
|          |            | {Ch-Ch} | 35.57       | 639125  | 0.93      |          |
| 4        | 720        | {16-16} | 14.34       | 613650  | 1.28      | 5.93     |
|          |            | {Ch-16} | 21.58       | 1434707 | 2.71      |          |
|          |            | {Ch-Ch} | 37.49       | 662850  | 0.97      |          |

**Table SI-11:** *K* values for homodimer equilibration # 2 in 2.5 mol % sterol LUVs in the absence of  $\text{CHCl}_3$ . The reaction was carried out at 45 °C.

| Sample # | Time (min) | Dimer   | $t_R$ (min) | Area    | N (nmols) | <i>K</i> |
|----------|------------|---------|-------------|---------|-----------|----------|
| 1        | 720        | {16-16} | 14.51       | 1476118 | 3.09      | 2.90     |
|          |            | {Ch-16} | 22.15       | 2711061 | 5.11      |          |
|          |            | {Ch-Ch} | 39.03       | 1810590 | 2.91      |          |
| 2        | 720        | {16-16} | 14.43       | 1540043 | 3.22      | 2.92     |
|          |            | {Ch-16} | 22.05       | 2809665 | 5.29      |          |
|          |            | {Ch-Ch} | 38.94       | 1849159 | 2.97      |          |
| 3        | 720        | {16-16} | 14.46       | 1462956 | 3.06      | 2.84     |
|          |            | {Ch-16} | 22.10       | 2640730 | 4.97      |          |
|          |            | {Ch-Ch} | 39.07       | 1777849 | 2.85      |          |
| 4        | 720        | {16-16} | 14.51       | 1428418 | 2.99      | 2.95     |
|          |            | {Ch-16} | 22.18       | 2653750 | 5.00      |          |
|          |            | {Ch-Ch} | 39.15       | 1767435 | 2.83      |          |

**Table SI-12:** *K* values for homodimer equilibration # 2 in 2.5 mol % sterol LUVs in the presence of  $\text{CHCl}_3$ . The reaction was carried out at 45 °C.

| Sample # | Time (min) | Dimer   | $t_R$ (min) | Area    | N (nmols) | <i>K</i> |
|----------|------------|---------|-------------|---------|-----------|----------|
| 1        | 720        | {16-16} | 14.66       | 569399  | 1.19      | 5.42     |
|          |            | {Ch-16} | 22.33       | 1370444 | 2.59      |          |
|          |            | {Ch-Ch} | 39.15       | 706642  | 1.04      |          |
| 2        | 720        | {16-16} | 14.66       | 573064  | 1.20      | 5.77     |
|          |            | {Ch-16} | 22.35       | 1388626 | 2.63      |          |
|          |            | {Ch-Ch} | 39.19       | 681151  | 1.00      |          |
| 3        | 720        | {16-16} | 14.67       | 571572  | 1.20      | 5.71     |
|          |            | {Ch-16} | 22.39       | 1373561 | 2.60      |          |
|          |            | {Ch-Ch} | 39.22       | 676200  | 0.99      |          |
| 4        | 720        | {16-16} | 14.71       | 596310  | 1.25      | 5.71     |
|          |            | {Ch-16} | 22.42       | 1414434 | 2.67      |          |
|          |            | {Ch-Ch} | 39.27       | 684767  | 1.00      |          |

**Table SI-13:** Overall  $K$  values for 2.5 mol % sterol LUVs (45 °C).

|                      | $K$ v a l u e s |                 |                 |
|----------------------|-----------------|-----------------|-----------------|
|                      | Hetero          | Homo            | Cumulative      |
| No $\text{CHCl}_3$   | $4.01 \pm 0.47$ | $2.89 \pm 0.05$ | $3.45 \pm 0.66$ |
| With $\text{CHCl}_3$ | $6.04 \pm 0.18$ | $5.56 \pm 0.32$ | $5.80 \pm 0.35$ |

**1.2.2.2.  $K$  values for 20 mol % Sterol LUVs at 45 °C****Table SI-14:**  $K$  values for heterodimer equilibration # 1 in 20 mol % sterol LUVs in the absence of  $\text{CHCl}_3$ . The reaction was carried out at 45 °C.

| Sample # | Time (min) | Dimer   | $t_R$ (min) | Area    | N (nmols) | $K$  |
|----------|------------|---------|-------------|---------|-----------|------|
| 1        | 720        | {16-16} | 12.82       | 1776252 | 3.72      | 4.51 |
|          |            | {Ch-16} | 19.58       | 4171973 | 7.84      |      |
|          |            | {Ch-Ch} | 36.12       | 2263322 | 3.67      |      |
| 2        | 720        | {16-16} | 12.79       | 1772557 | 3.71      | 4.41 |
|          |            | {Ch-16} | 19.54       | 4191395 | 7.88      |      |
|          |            | {Ch-Ch} | 36.10       | 2339333 | 3.80      |      |
| 3        | 720        | {16-16} | 12.91       | 1781386 | 3.73      | 4.48 |
|          |            | {Ch-16} | 19.72       | 4133527 | 7.77      |      |
|          |            | {Ch-Ch} | 36.35       | 2234248 | 3.62      |      |
| 4        | 720        | {16-16} | 12.99       | 1828864 | 3.83      | 4.52 |
|          |            | {Ch-16} | 19.86       | 4351047 | 8.18      |      |
|          |            | {Ch-Ch} | 36.57       | 2382634 | 3.87      |      |

**Table SI-15:**  $K$  values for heterodimer equilibration # 1 in 20 mol % sterol LUVs in the presence of  $\text{CHCl}_3$ . The reaction was carried out at 45 °C.

| Sample # | Time (min) | Dimer   | $t_R$ (min) | Area    | N (nmols) | $K$  |
|----------|------------|---------|-------------|---------|-----------|------|
| 1        | 720        | {16-16} | 12.92       | 813120  | 1.70      | 6.17 |
|          |            | {Ch-16} | 19.73       | 2175206 | 4.10      |      |
|          |            | {Ch-Ch} | 36.10       | 1038674 | 1.60      |      |
| 2        | 720        | {16-16} | 12.88       | 771511  | 1.61      | 5.95 |
|          |            | {Ch-16} | 19.72       | 2093633 | 3.95      |      |
|          |            | {Ch-Ch} | 36.04       | 1050472 | 1.62      |      |
| 3        | 720        | {16-16} | 13.00       | 850341  | 1.78      | 6.14 |
|          |            | {Ch-16} | 19.86       | 2258103 | 4.26      |      |
|          |            | {Ch-Ch} | 36.28       | 1071584 | 1.66      |      |
| 4        | 720        | {16-16} | 13.12       | 704522  | 1.47      | 6.37 |
|          |            | {Ch-16} | 20.07       | 1909197 | 3.60      |      |
|          |            | {Ch-Ch} | 36.51       | 908049  | 1.38      |      |

**Table SI-16:** *K* values for heterodimer equilibration # 2 in 20 mol % sterol LUVs in the absence of CHCl<sub>3</sub>. The reaction was carried out at 45 °C.

| Sample # | Time (min) | Dimer   | t <sub>R</sub> (min) | Area    | N (nmols) | <i>K</i> |
|----------|------------|---------|----------------------|---------|-----------|----------|
| 1        | 720        | {16-16} | 12.95                | 1592478 | 3.33      | 4.35     |
|          |            | {Ch-16} | 19.83                | 3668034 | 6.90      |          |
|          |            | {Ch-Ch} | 36.50                | 2034729 | 3.28      |          |
| 2        | 720        | {16-16} | 12.98                | 1729399 | 3.62      | 4.33     |
|          |            | {Ch-16} | 19.86                | 3974317 | 7.47      |          |
|          |            | {Ch-Ch} | 36.56                | 2199372 | 3.56      |          |
| 3        | 720        | {16-16} | 13.00                | 1677591 | 3.51      | 4.32     |
|          |            | {Ch-16} | 19.88                | 3874950 | 7.29      |          |
|          |            | {Ch-Ch} | 36.57                | 2165369 | 3.50      |          |
| 4        | 720        | {16-16} | 13.00                | 1504335 | 3.15      | 4.40     |
|          |            | {Ch-16} | 19.92                | 3444705 | 6.48      |          |
|          |            | {Ch-Ch} | 36.57                | 1887144 | 3.03      |          |

**Table SI-17:** *K* values for heterodimer equilibration # 2 in 20 mol % sterol LUVs in the presence of CHCl<sub>3</sub>. The reaction was carried out at 45 °C.

| Sample # | Time (min) | Dimer   | t <sub>R</sub> (min) | Area    | N (nmols) | <i>K</i> |
|----------|------------|---------|----------------------|---------|-----------|----------|
| 1        | 720        | {16-16} | 13.05                | 993886  | 2.08      | 6.05     |
|          |            | {Ch-16} | 19.98                | 2658138 | 5.01      |          |
|          |            | {Ch-Ch} | 36.54                | 1270329 | 1.99      |          |
| 2        | 720        | {16-16} | 13.08                | 948797  | 1.99      | 6.04     |
|          |            | {Ch-16} | 20.03                | 2524125 | 4.75      |          |
|          |            | {Ch-Ch} | 36.50                | 1207496 | 1.89      |          |
| 3        | 720        | {16-16} | 13.09                | 1041706 | 2.18      | 5.86     |
|          |            | {Ch-16} | 20.04                | 2740669 | 5.16      |          |
|          |            | {Ch-Ch} | 36.65                | 1323949 | 2.08      |          |
| 4        | 720        | {16-16} | 13.13                | 1021227 | 2.14      | 6.11     |
|          |            | {Ch-16} | 20.10                | 2685498 | 5.06      |          |
|          |            | {Ch-Ch} | 36.74                | 1250879 | 1.96      |          |

**Table SI-18:** *K* values for homodimer equilibration # 1 in 20 mol % sterol LUVs in the absence of CHCl<sub>3</sub>. The reaction was carried out at 45 °C.

| Sample # | Time (min) | Dimer   | t <sub>R</sub> (min) | Area    | N (nmols) | <i>K</i> |
|----------|------------|---------|----------------------|---------|-----------|----------|
| 1        | 720        | {16-16} | 12.81                | 1774505 | 3.71      | 4.12     |
|          |            | {Ch-16} | 19.59                | 4070730 | 7.65      |          |
|          |            | {Ch-Ch} | 36.12                | 2356991 | 3.83      |          |
| 2        | 720        | {16-16} | 12.86                | 1789207 | 3.74      | 4.14     |
|          |            | {Ch-16} | 19.45                | 4087590 | 7.69      |          |
|          |            | {Ch-Ch} | 36.20                | 2345616 | 3.81      |          |
| 3        | 720        | {16-16} | 12.95                | 1721616 | 3.60      | 4.11     |
|          |            | {Ch-16} | 19.81                | 3950005 | 7.43      |          |
|          |            | {Ch-Ch} | 36.43                | 2297548 | 3.73      |          |
| 4        | 720        | {16-16} | 13.02                | 1802736 | 3.77      | 4.11     |
|          |            | {Ch-16} | 19.90                | 4112778 | 7.73      |          |
|          |            | {Ch-Ch} | 36.57                | 2374582 | 3.86      |          |

**Table SI-19:** *K* values for homodimer equilibration # 1 in 20 mol % sterol LUVs in the presence of  $\text{CHCl}_3$ . The reaction was carried out at 45 °C.

| Sample # | Time (min) | Dimer   | $t_R$ (min) | Area    | N (nmols) | <i>K</i> |
|----------|------------|---------|-------------|---------|-----------|----------|
| 1        | 720        | {16-16} | 12.88       | 724445  | 1.52      | 5.88     |
|          |            | {Ch-16} | 19.70       | 1914298 | 3.61      |          |
|          |            | {Ch-Ch} | 35.95       | 956594  | 1.46      |          |
| 2        | 720        | {16-16} | 12.98       | 708531  | 1.48      | 6.25     |
|          |            | {Ch-16} | 19.85       | 1910866 | 3.61      |          |
|          |            | {Ch-Ch} | 36.22       | 921522  | 1.40      |          |
| 3        | 720        | {16-16} | 13.07       | 759867  | 1.59      | 5.95     |
|          |            | {Ch-16} | 19.99       | 1972263 | 3.72      |          |
|          |            | {Ch-Ch} | 36.43       | 956569  | 1.46      |          |
| 4        | 720        | {16-16} | 13.11       | 729807  | 1.53      | 6.10     |
|          |            | {Ch-16} | 20.05       | 1904353 | 3.59      |          |
|          |            | {Ch-Ch} | 36.51       | 911487  | 1.39      |          |

**Table SI-20:** *K* values for homodimer equilibration # 2 in 20 mol % sterol LUVs in the absence of  $\text{CHCl}_3$ . The reaction was carried out at 45 °C.

| Sample # | Time (min) | Dimer   | $t_R$ (min) | Area    | N (nmols) | <i>K</i> |
|----------|------------|---------|-------------|---------|-----------|----------|
| 1        | 720        | {16-16} | 13.13       | 1710274 | 3.58      | 3.89     |
|          |            | {Ch-16} | 20.09       | 3762554 | 7.08      |          |
|          |            | {Ch-Ch} | 36.76       | 2219756 | 3.60      |          |
| 2        | 720        | {16-16} | 13.12       | 1744164 | 3.65      | 3.88     |
|          |            | {Ch-16} | 20.94       | 3883779 | 7.30      |          |
|          |            | {Ch-Ch} | 38.82       | 2321722 | 3.77      |          |
| 3        | 720        | {16-16} | 13.40       | 1558221 | 3.26      | 3.94     |
|          |            | {Ch-16} | 20.42       | 3469063 | 6.53      |          |
|          |            | {Ch-Ch} | 37.12       | 2055544 | 3.32      |          |
| 4        | 720        | {16-16} | 13.27       | 1458968 | 3.05      | 3.83     |
|          |            | {Ch-16} | 20.32       | 3199385 | 6.02      |          |
|          |            | {Ch-Ch} | 37.09       | 1926250 | 3.10      |          |

**Table SI-21:** *K* values for homodimer equilibration # 2 in 20 mol % sterol LUVs in the presence of  $\text{CHCl}_3$ . The reaction was carried out at 45 °C.

| Sample # | Time (min) | Dimer   | $t_R$ (min) | Area    | N (nmols) | <i>K</i> |
|----------|------------|---------|-------------|---------|-----------|----------|
| 1        | 720        | {16-16} | 13.43       | 1109374 | 2.32      | 5.46     |
|          |            | {Ch-16} | 20.52       | 2905389 | 5.47      |          |
|          |            | {Ch-Ch} | 37.31       | 1486750 | 2.36      |          |
| 2        | 720        | {16-16} | 13.43       | 1068771 | 2.24      | 5.62     |
|          |            | {Ch-16} | 20.53       | 2800763 | 5.27      |          |
|          |            | {Ch-Ch} | 37.29       | 1399339 | 2.21      |          |
| 3        | 720        | {16-16} | 13.49       | 1158903 | 2.42      | 5.57     |
|          |            | {Ch-16} | 20.62       | 2899944 | 5.46      |          |
|          |            | {Ch-Ch} | 37.46       | 1397343 | 2.21      |          |
| 4        | 720        | {16-16} | 13.58       | 1144019 | 2.39      | 5.51     |
|          |            | {Ch-16} | 20.73       | 2918796 | 5.49      |          |
|          |            | {Ch-Ch} | 37.57       | 1445491 | 2.29      |          |

**Table SI-22:** Overall *K* values for 20 mol % sterol LUVs (45 °C)

|                        | <i>K</i> v a l u e s |             |             |
|------------------------|----------------------|-------------|-------------|
|                        | Hetero               | Homo        | Cumulative  |
| No CHCl <sub>3</sub>   | 4.41 ± 0.08          | 4.00 ± 0.13 | 4.21 ± 0.24 |
| With CHCl <sub>3</sub> | 6.09 ± 0.15          | 5.79 ± 0.29 | 5.94 ± 0.27 |

**1.2.2.3. *K* values for 32 mol % Sterol LUVs at 45 °C****Table SI-23:** *K* values for heterodimer equilibration # 1 in 32 mol % sterol LUVs in the absence of CHCl<sub>3</sub>. The reaction was carried out at 45 °C.

| Sample # | Time (min) | Dimer   | t <sub>R</sub> (min) | Area    | N (nmols) | <i>K</i> |
|----------|------------|---------|----------------------|---------|-----------|----------|
| 1        | 720        | {16-16} | 13.44                | 1157861 | 2.42      | 8.18     |
|          |            | {Ch-16} | 20.53                | 3715856 | 6.99      |          |
|          |            | {Ch-Ch} | 37.47                | 1550326 | 2.47      |          |
| 2        | 720        | {16-16} | 13.43                | 1254727 | 2.63      | 8.16     |
|          |            | {Ch-16} | 20.51                | 4119796 | 7.75      |          |
|          |            | {Ch-Ch} | 37.44                | 1748146 | 2.80      |          |
| 3        | 720        | {16-16} | 13.47                | 1275164 | 2.67      | 8.19     |
|          |            | {Ch-16} | 20.57                | 4093439 | 7.70      |          |
|          |            | {Ch-Ch} | 37.58                | 1695499 | 2.71      |          |
| 4        | 720        | {16-16} | 13.55                | 1251730 | 2.62      | 8.14     |
|          |            | {Ch-16} | 20.69                | 4005941 | 7.53      |          |
|          |            | {Ch-Ch} | 37.74                | 1666676 | 2.66      |          |

**Table SI-24:** *K* values for heterodimer equilibration # 1 in 32 mol % sterol LUVs in the presence of CHCl<sub>3</sub>. The reaction was carried out at 45 °C.

| Sample # | Time (min) | Dimer   | t <sub>R</sub> (min) | Area    | N (nmols) | <i>K</i> |
|----------|------------|---------|----------------------|---------|-----------|----------|
| 1        | 720        | {16-16} | 13.64                | 972596  | 2.04      | 6.08     |
|          |            | {Ch-16} | 20.90                | 2610665 | 4.92      |          |
|          |            | {Ch-Ch} | 37.86                | 1248039 | 1.96      |          |
| 2        | 720        | {16-16} | 13.73                | 904898  | 1.89      | 6.13     |
|          |            | {Ch-16} | 21.04                | 2461862 | 4.64      |          |
|          |            | {Ch-Ch} | 38.01                | 1187787 | 1.85      |          |
| 3        | 720        | {16-16} | 13.76                | 955543  | 2.00      | 6.01     |
|          |            | {Ch-16} | 21.08                | 2533537 | 4.77      |          |
|          |            | {Ch-Ch} | 38.13                | 1211783 | 1.89      |          |
| 4        | 720        | {16-16} | 13.90                | 871084  | 1.82      | 6.07     |
|          |            | {Ch-16} | 21.29                | 2371516 | 4.47      |          |
|          |            | {Ch-Ch} | 38.38                | 1159931 | 1.81      |          |

**Table SI-25:** *K* values for heterodimer equilibration # 2 in 32 mol % sterol LUVs in the absence of CHCl<sub>3</sub>. The reaction was carried out at 45 °C.

| Sample # | Time (min) | Dimer   | t <sub>R</sub> (min) | Area    | N (nmols) | <i>K</i> |
|----------|------------|---------|----------------------|---------|-----------|----------|
| 1        | 720        | {16-16} | 13.93                | 1231955 | 2.58      | 8.23     |
|          |            | {Ch-16} | 21.28                | 3982094 | 7.49      |          |
|          |            | {Ch-Ch} | 38.64                | 1655775 | 2.64      |          |
| 2        | 720        | {16-16} | 14.03                | 1346664 | 2.82      | 8.26     |
|          |            | {Ch-16} | 21.43                | 4411760 | 8.29      |          |
|          |            | {Ch-Ch} | 38.90                | 1840540 | 2.96      |          |
| 3        | 720        | {16-16} | 14.13                | 1257021 | 2.63      | 8.15     |
|          |            | {Ch-16} | 21.59                | 4075910 | 7.66      |          |
|          |            | {Ch-Ch} | 39.10                | 1711528 | 2.74      |          |
| 4        | 720        | {16-16} | 14.27                | 1365686 | 2.86      | 8.23     |
|          |            | {Ch-16} | 21.78                | 4402506 | 8.28      |          |
|          |            | {Ch-Ch} | 39.36                | 1814396 | 2.91      |          |

**Table SI-26:** *K* values for heterodimer equilibration # 2 in 32 mol % sterol LUVs in the presence of CHCl<sub>3</sub>. The reaction was carried out at 45 °C.

| Sample # | Time (min) | Dimer   | t <sub>R</sub> (min) | Area    | N (nmols) | <i>K</i> |
|----------|------------|---------|----------------------|---------|-----------|----------|
| 1        | 720        | {16-16} | 14.44                | 882904  | 1.85      | 6.13     |
|          |            | {Ch-16} | 22.14                | 2379747 | 4.48      |          |
|          |            | {Ch-Ch} | 39.67                | 1142491 | 1.78      |          |
| 2        | 720        | {16-16} | 14.71                | 879110  | 1.84      | 6.12     |
|          |            | {Ch-16} | 22.57                | 2328950 | 4.39      |          |
|          |            | {Ch-Ch} | 40.24                | 1102994 | 1.71      |          |
| 3        | 720        | {16-16} | 15.01                | 870498  | 1.82      | 6.13     |
|          |            | {Ch-16} | 23.01                | 2346874 | 4.42      |          |
|          |            | {Ch-Ch} | 40.95                | 1126970 | 1.75      |          |
| 4        | 720        | {16-16} | 15.36                | 879464  | 1.84      | 5.92     |
|          |            | {Ch-16} | 23.57                | 2341272 | 4.41      |          |
|          |            | {Ch-Ch} | 41.81                | 1147608 | 1.79      |          |

**Table SI-27:** *K* values for homodimer equilibration # 1 in 32 mol % sterol LUVs in the absence of CHCl<sub>3</sub>. The reaction was carried out at 45 °C.

| Sample # | Time (min) | Dimer   | t <sub>R</sub> (min) | Area    | N (nmols) | <i>K</i> |
|----------|------------|---------|----------------------|---------|-----------|----------|
| 1        | 720        | {16-16} | 13.02                | 1232709 | 2.58      | 7.19     |
|          |            | {Ch-16} | 19.87                | 3836960 | 7.22      |          |
|          |            | {Ch-Ch} | 36.83                | 1752291 | 2.81      |          |
| 2        | 720        | {16-16} | 13.06                | 1231887 | 2.58      | 7.39     |
|          |            | {Ch-16} | 19.93                | 3837145 | 7.22      |          |
|          |            | {Ch-Ch} | 36.95                | 1708567 | 2.73      |          |
| 3        | 720        | {16-16} | 13.05                | 1219953 | 2.55      | 7.22     |
|          |            | {Ch-16} | 19.96                | 3773792 | 7.10      |          |
|          |            | {Ch-Ch} | 36.96                | 1709524 | 2.73      |          |
| 4        | 720        | {16-16} | 13.14                | 1161464 | 2.43      | 7.50     |
|          |            | {Ch-16} | 20.05                | 3658865 | 6.88      |          |
|          |            | {Ch-Ch} | 37.08                | 1628866 | 2.60      |          |

**Table SI-28:** *K* values for homodimer equilibration # 1 in 32 mol % sterol LUVs in the presence of  $\text{CHCl}_3$ . The reaction was carried out at 45 °C.

| Sample # | Time (min) | Dimer   | $t_R$ (min) | Area    | N (nmols) | <i>K</i> |
|----------|------------|---------|-------------|---------|-----------|----------|
| 1        | 720        | {16-16} | 13.51       | 734195  | 1.54      | 5.85     |
|          |            | {Ch-16} | 20.67       | 1971606 | 3.72      |          |
|          |            | {Ch-Ch} | 37.73       | 1001304 | 1.54      |          |
| 2        | 720        | {16-16} | 13.51       | 758561  | 1.59      | 6.20     |
|          |            | {Ch-16} | 20.71       | 2066349 | 3.90      |          |
|          |            | {Ch-Ch} | 37.76       | 1003425 | 1.54      |          |
| 3        | 720        | {16-16} | 13.59       | 752450  | 1.57      | 6.06     |
|          |            | {Ch-16} | 20.80       | 2083062 | 3.93      |          |
|          |            | {Ch-Ch} | 37.95       | 1048032 | 1.62      |          |
| 4        | 720        | {16-16} | 13.66       | 766647  | 1.60      | 6.04     |
|          |            | {Ch-16} | 20.88       | 2083556 | 3.93      |          |
|          |            | {Ch-Ch} | 38.04       | 1034413 | 1.59      |          |

**Table SI-29:** *K* values for homodimer equilibration # 2 in 32 mol % sterol LUVs in the absence of  $\text{CHCl}_3$ . The reaction was carried out at 45 °C.

| Sample # | Time (min) | Dimer   | $t_R$ (min) | Area    | N (nmols) | <i>K</i> |
|----------|------------|---------|-------------|---------|-----------|----------|
| 1        | 720        | {16-16} | 13.16       | 1215616 | 2.54      | 7.35     |
|          |            | {Ch-16} | 20.09       | 3821953 | 7.19      |          |
|          |            | {Ch-Ch} | 37.11       | 1727053 | 2.76      |          |
| 2        | 720        | {16-16} | 13.22       | 1200796 | 2.51      | 7.36     |
|          |            | {Ch-16} | 20.16       | 3730361 | 7.02      |          |
|          |            | {Ch-Ch} | 37.22       | 1665505 | 2.66      |          |
| 3        | 720        | {16-16} | 13.24       | 1163811 | 2.44      | 7.75     |
|          |            | {Ch-16} | 20.23       | 3753720 | 7.06      |          |
|          |            | {Ch-Ch} | 37.32       | 1654765 | 2.64      |          |
| 4        | 720        | {16-16} | 13.27       | 1213555 | 2.54      | 7.46     |
|          |            | {Ch-16} | 20.25       | 3832851 | 7.21      |          |
|          |            | {Ch-Ch} | 37.40       | 1714661 | 2.74      |          |

**Table SI-30:** *K* values for homodimer equilibration # 2 in 32 mol % sterol LUVs in the presence of  $\text{CHCl}_3$ . The reaction was carried out at 45 °C.

| Sample # | Time (min) | Dimer   | $t_R$ (min) | Area    | N (nmols) | <i>K</i> |
|----------|------------|---------|-------------|---------|-----------|----------|
| 1        | 720        | {16-16} | 13.80       | 717393  | 1.50      | 6.17     |
|          |            | {Ch-16} | 21.11       | 1948631 | 3.68      |          |
|          |            | {Ch-Ch} | 38.35       | 953608  | 1.46      |          |
| 2        | 720        | {16-16} | 13.68       | 728273  | 1.52      | 5.87     |
|          |            | {Ch-16} | 20.94       | 1950143 | 3.68      |          |
|          |            | {Ch-Ch} | 38.10       | 986841  | 1.51      |          |
| 3        | 720        | {16-16} | 13.82       | 771011  | 1.61      | 6.19     |
|          |            | {Ch-16} | 21.16       | 2112253 | 3.98      |          |
|          |            | {Ch-Ch} | 38.49       | 1031402 | 1.59      |          |
| 4        | 720        | {16-16} | 13.93       | 824919  | 1.73      | 5.92     |
|          |            | {Ch-16} | 21.30       | 2179289 | 4.11      |          |
|          |            | {Ch-Ch} | 38.67       | 1067759 | 1.65      |          |

**Table SI-31:** Overall  $K$  values for 32 mol % sterol LUVs (45 °C).

|                      | $K$ v a l u e s |                 |                 |
|----------------------|-----------------|-----------------|-----------------|
|                      | Hetero          | Homo            | Cumulative      |
| No $\text{CHCl}_3$   | $8.19 \pm 0.04$ | $7.40 \pm 0.18$ | $7.80 \pm 0.43$ |
| With $\text{CHCl}_3$ | $6.07 \pm 0.07$ | $6.04 \pm 0.14$ | $6.06 \pm 0.11$ |

**1.2.2.4.  $K$  values for 40 mol % Sterol LUVs at 45 °C****Table SI-32:**  $K$  values for heterodimer equilibration # 1 in 40 mol % sterol LUVs in the absence of  $\text{CHCl}_3$ . The reaction was carried out at 45 °C.

| Sample # | Time (min) | Dimer   | $t_R$ (min) | Area    | N (nmols) | $K$  |
|----------|------------|---------|-------------|---------|-----------|------|
| 1        | 720        | {16-16} | 14.60       | 1110311 | 2.32      | 9.36 |
|          |            | {Ch-16} | 22.18       | 4052154 | 7.62      |      |
|          |            | {Ch-Ch} | 39.41       | 1671336 | 2.67      |      |
| 2        | 720        | {16-16} | 15.12       | 1180893 | 2.47      | 9.53 |
|          |            | {Ch-16} | 22.82       | 4152471 | 7.81      |      |
|          |            | {Ch-Ch} | 40.23       | 1622083 | 2.59      |      |
| 3        | 720        | {16-16} | 14.96       | 1101632 | 2.31      | 9.48 |
|          |            | {Ch-16} | 22.75       | 4031768 | 7.58      |      |
|          |            | {Ch-Ch} | 40.32       | 1647841 | 2.63      |      |
| 4        | 720        | {16-16} | 15.41       | 1167786 | 2.44      | 8.85 |
|          |            | {Ch-16} | 23.45       | 4128400 | 7.76      |      |
|          |            | {Ch-Ch} | 41.19       | 1740641 | 2.79      |      |

**Table SI-33:**  $K$  values for heterodimer equilibration # 1 in 40 mol % sterol LUVs in the presence of  $\text{CHCl}_3$ . The reaction was carried out at 45 °C.

| Sample # | Time (min) | Dimer   | $t_R$ (min) | Area    | N (nmols) | $K$  |
|----------|------------|---------|-------------|---------|-----------|------|
| 1        | 720        | {16-16} | 14.68       | 1077535 | 2.25      | 6.33 |
|          |            | {Ch-16} | 22.35       | 2955536 | 5.56      |      |
|          |            | {Ch-Ch} | 39.46       | 1374368 | 2.17      |      |
| 2        | 720        | {16-16} | 15.05       | 1177869 | 2.46      | 5.77 |
|          |            | {Ch-16} | 22.97       | 2867616 | 5.40      |      |
|          |            | {Ch-Ch} | 40.30       | 1304322 | 2.05      |      |
| 3        | 720        | {16-16} | 15.03       | 1053514 | 2.20      | 6.20 |
|          |            | {Ch-16} | 22.93       | 2961160 | 5.57      |      |
|          |            | {Ch-Ch} | 40.93       | 1437084 | 2.27      |      |
| 4        | 720        | {16-16} | 15.37       | 1073088 | 2.25      | 6.21 |
|          |            | {Ch-16} | 23.47       | 2835775 | 5.34      |      |
|          |            | {Ch-Ch} | 41.15       | 1300123 | 2.04      |      |

**Table SI-34:** *K* values for heterodimer equilibration # 2 in 40 mol % sterol LUVs in the absence of CHCl<sub>3</sub>. The reaction was carried out at 45 °C.

| Sample # | Time (min) | Dimer   | t <sub>R</sub> (min) | Area    | N (nmols) | <i>K</i> |
|----------|------------|---------|----------------------|---------|-----------|----------|
| 1        | 450        | {16-16} | 18.94                | 1683884 | 3.52      | 9.29     |
|          |            | {Ch-16} | 28.07                | 5506522 | 10.34     |          |
|          |            | {Ch-Ch} | 46.73                | 2027043 | 3.27      |          |
| 2        | 450        | {16-16} | 19.03                | 1541859 | 3.23      | 9.01     |
|          |            | {Ch-16} | 28.21                | 5066611 | 9.52      |          |
|          |            | {Ch-Ch} | 46.95                | 1936759 | 3.12      |          |

**Table SI-35:** *K* values for heterodimer equilibration # 2 in 40 mol % sterol LUVs in the presence of CHCl<sub>3</sub>. The reaction was carried out at 45 °C.

| Sample # | Time (min) | Dimer   | t <sub>R</sub> (min) | Area    | N (nmols) | <i>K</i> |
|----------|------------|---------|----------------------|---------|-----------|----------|
| 1        | 360        | {16-16} | 18.86                | 1920776 | 4.02      | 6.13     |
|          |            | {Ch-16} | 28.00                | 5112772 | 9.61      |          |
|          |            | {Ch-Ch} | 46.55                | 2307982 | 3.75      |          |
| 2        | 435        | {16-16} | 18.83                | 1897491 | 3.97      | 5.87     |
|          |            | {Ch-16} | 27.97                | 4977865 | 9.35      |          |
|          |            | {Ch-Ch} | 46.47                | 2311919 | 3.75      |          |
| 3        | 540        | {16-16} | 18.98                | 1792450 | 3.75      | 5.79     |
|          |            | {Ch-16} | 28.22                | 4820544 | 9.06      |          |
|          |            | {Ch-Ch} | 47.38                | 2327549 | 3.78      |          |
| 4        | 450        | {16-16} | 19.21                | 2024841 | 4.24      | 5.81     |
|          |            | {Ch-16} | 28.46                | 5384412 | 10.12     |          |
|          |            | {Ch-Ch} | 47.49                | 2553085 | 4.16      |          |
| 5        | 450        | {16-16} | 19.93                | 2012461 | 4.21      | 5.85     |
|          |            | {Ch-16} | 29.66                | 5125794 | 9.63      |          |
|          |            | {Ch-Ch} | 48.98                | 2321232 | 3.77      |          |
| 6        | 450        | {16-16} | 20.14                | 1803540 | 3.77      | 6.50     |
|          |            | {Ch-16} | 30.06                | 5075595 | 9.54      |          |
|          |            | {Ch-Ch} | 49.44                | 2284794 | 3.71      |          |
| 7        | 450        | {16-16} | 20.00                | 1680343 | 3.52      | 5.59     |
|          |            | {Ch-16} | 29.56                | 4257157 | 8.00      |          |
|          |            | {Ch-Ch} | 48.51                | 2021665 | 3.26      |          |

**Table SI-36:** *K* values for heterodimer equilibration # 3 in 40 mol % sterol LUVs in the absence of CHCl<sub>3</sub>. The reaction was carried out at 45 °C.

| Sample # | Time (min) | Dimer   | t <sub>R</sub> (min) | Area    | N (nmols) | <i>K</i> |
|----------|------------|---------|----------------------|---------|-----------|----------|
| 1        | 300        | {16-16} | 14.20                | 1798323 | 3.76      | 9.04     |
|          |            | {Ch-16} | 21.35                | 5904167 | 11.09     |          |
|          |            | {Ch-Ch} | 37.92                | 2231473 | 3.62      |          |
| 2        | 360        | {16-16} | 15.76                | 1961614 | 4.10      | 8.94     |
|          |            | {Ch-16} | 23.54                | 6513669 | 12.23     |          |
|          |            | {Ch-Ch} | 40.46                | 2504919 | 4.08      |          |
| 3        | 420        | {16-16} | 15.53                | 1820075 | 3.81      | 8.89     |
|          |            | {Ch-16} | 23.22                | 6012837 | 11.29     |          |
|          |            | {Ch-Ch} | 39.82                | 2322319 | 3.77      |          |
| 4        | 480        | {16-16} | 15.27                | 1917942 | 4.01      | 8.95     |
|          |            | {Ch-16} | 22.85                | 6351716 | 11.93     |          |
|          |            | {Ch-Ch} | 39.37                | 2436421 | 3.96      |          |

**Table SI-37:** *K* values for heterodimer equilibration # 4 in 40 mol % sterol LUVs in the absence of CHCl<sub>3</sub>. The reaction was carried out at 45 °C.

| Sample # | Time (min) | Dimer   | t <sub>R</sub> (min) | Area    | N (nmols) | <i>K</i> |
|----------|------------|---------|----------------------|---------|-----------|----------|
| 1        | 450        | {16-16} | 14.25                | 1790184 | 3.75      | 8.80     |
|          |            | {Ch-16} | 21.37                | 5840794 | 10.97     |          |
|          |            | {Ch-Ch} | 38.14                | 2251925 | 3.65      |          |
| 2        | 450        | {16-16} | 14.26                | 1896290 | 3.97      | 9.91     |
|          |            | {Ch-16} | 21.45                | 6775121 | 12.72     |          |
|          |            | {Ch-Ch} | 38.43                | 2527679 | 4.12      |          |
| 3        | 450        | {16-16} | 14.44                | 1899243 | 3.97      | 9.28     |
|          |            | {Ch-16} | 21.67                | 6689352 | 12.56     |          |
|          |            | {Ch-Ch} | 38.64                | 2624705 | 4.28      |          |
| 4        | 450        | {16-16} | 14.12                | 1257535 | 2.63      | 9.49     |
|          |            | {Ch-16} | 21.22                | 4250280 | 7.99      |          |
|          |            | {Ch-Ch} | 37.51                | 1603545 | 2.56      |          |

**Table SI-38:** *K* values for homodimer equilibration # 1 in 40 mol % sterol LUVs in the absence of CHCl<sub>3</sub>. The reaction was carried out at 45 °C.

| Sample # | Time (min) | Dimer   | t <sub>R</sub> (min) | Area    | N (nmols) | <i>K</i> |
|----------|------------|---------|----------------------|---------|-----------|----------|
| 1        | 720        | {16-16} | 13.36                | 973998  | 2.04      | 8.40     |
|          |            | {Ch-16} | 20.41                | 3133204 | 5.90      |          |
|          |            | {Ch-Ch} | 37.52                | 1292417 | 2.03      |          |
| 2        | 720        | {16-16} | 13.34                | 1006472 | 2.11      | 8.43     |
|          |            | {Ch-16} | 20.36                | 3213465 | 6.05      |          |
|          |            | {Ch-Ch} | 37.46                | 1310497 | 2.06      |          |
| 3        | 720        | {16-16} | 13.38                | 1096218 | 2.29      | 8.47     |
|          |            | {Ch-16} | 20.43                | 3580212 | 6.73      |          |
|          |            | {Ch-Ch} | 37.62                | 1471865 | 2.33      |          |
| 4        | 720        | {16-16} | 13.45                | 1078783 | 2.26      | 8.27     |
|          |            | {Ch-16} | 20.54                | 3469637 | 6.53      |          |
|          |            | {Ch-Ch} | 37.77                | 1440867 | 2.28      |          |

**Table SI-39:** *K* values for homodimer equilibration # 1 in 40 mol % sterol LUVs in the presence of CHCl<sub>3</sub>. The reaction was carried out at 45 °C.

| Sample # | Time (min) | Dimer   | t <sub>R</sub> (min) | Area    | N (nmols) | <i>K</i> |
|----------|------------|---------|----------------------|---------|-----------|----------|
| 1        | 720        | {16-16} | 14.68                | 1259493 | 2.64      | 5.93     |
|          |            | {Ch-16} | 22.39                | 3463465 | 6.52      |          |
|          |            | {Ch-Ch} | 39.70                | 1699037 | 2.72      |          |
| 2        | 720        | {16-16} | 14.88                | 1254939 | 2.63      | 5.66     |
|          |            | {Ch-16} | 22.69                | 3395610 | 6.39      |          |
|          |            | {Ch-Ch} | 40.14                | 1716449 | 2.75      |          |
| 3        | 720        | {16-16} | 15.40                | 1378367 | 2.88      | 5.92     |
|          |            | {Ch-16} | 23.45                | 3678879 | 6.92      |          |
|          |            | {Ch-Ch} | 41.21                | 1751651 | 2.81      |          |
| 4        | 720        | {16-16} | 15.79                | 1258054 | 2.63      | 5.74     |
|          |            | {Ch-16} | 24.11                | 3338577 | 6.28      |          |
|          |            | {Ch-Ch} | 42.30                | 1635436 | 2.61      |          |

**Table SI-40:** *K* values for homodimer equilibration # 2 in 40 mol % sterol LUVs in the absence of CHCl<sub>3</sub>. The reaction was carried out at 45 °C.

| Sample # | Time (min) | Dimer   | t <sub>R</sub> (min) | Area     | N (nmols) | <i>K</i> |
|----------|------------|---------|----------------------|----------|-----------|----------|
| 1        | 300        | {16-16} | 13.94                | 2661152  | 5.57      | 8.45     |
|          |            | {Ch-16} | 20.94                | 8696933  | 16.32     |          |
|          |            | {Ch-Ch} | 37.59                | 3443437  | 5.66      |          |
| 2        | 360        | {16-16} | 15.44                | 3402200  | 7.12      | 8.36     |
|          |            | {Ch-16} | 23.01                | 11229126 | 21.07     |          |
|          |            | {Ch-Ch} | 40.15                | 4509120  | 7.46      |          |
| 3        | 420        | {16-16} | 15.29                | 3220798  | 6.74      | 8.25     |
|          |            | {Ch-16} | 22.79                | 10569988 | 19.84     |          |
|          |            | {Ch-Ch} | 39.75                | 4278438  | 7.07      |          |
| 4        | 480        | {16-16} | 15.08                | 3554702  | 7.44      | 9.08     |
|          |            | {Ch-16} | 22.47                | 12017000 | 22.55     |          |
|          |            | {Ch-Ch} | 39.38                | 4545486  | 7.53      |          |

**Table SI-41:** *K* values for homodimer equilibration # 3 in 40 mol % sterol LUVs in the absence of CHCl<sub>3</sub>. The reaction was carried out at 45 °C.

| Sample # | Time (min) | Dimer   | t <sub>R</sub> (min) | Area    | N (nmols) | <i>K</i> |
|----------|------------|---------|----------------------|---------|-----------|----------|
| 1        | 450        | {16-16} | 15.34                | 1785841 | 3.74      | 9.06     |
|          |            | {Ch-16} | 22.81                | 5939933 | 11.16     |          |
|          |            | {Ch-Ch} | 39.51                | 2266932 | 3.68      |          |
| 2        | 450        | {16-16} | 15.51                | 1894637 | 3.96      | 8.85     |
|          |            | {Ch-16} | 23.06                | 6373075 | 11.97     |          |
|          |            | {Ch-Ch} | 39.95                | 2507024 | 4.08      |          |
| 3        | 450        | {16-16} | 15.73                | 1889115 | 3.95      | 8.64     |
|          |            | {Ch-16} | 23.39                | 6252907 | 11.74     |          |
|          |            | {Ch-Ch} | 40.40                | 2481698 | 4.04      |          |

**Table SI-42:** *K* values for homodimer equilibration # 4 in 40 mol % sterol LUVs in the absence of CHCl<sub>3</sub>. The reaction was carried out at 45 °C.

| Sample # | Time (min) | Dimer   | t <sub>R</sub> (min) | Area    | N (nmols) | <i>K</i> |
|----------|------------|---------|----------------------|---------|-----------|----------|
| 1        | 300        | {16-16} | 14.95                | 1098575 | 2.30      | 9.73     |
|          |            | {Ch-16} | 22.48                | 3833808 | 7.21      |          |
|          |            | {Ch-Ch} | 39.27                | 1466796 | 2.32      |          |
| 2        | 360        | {16-16} | 14.99                | 1093952 | 2.29      | 9.58     |
|          |            | {Ch-16} | 22.48                | 3780171 | 7.11      |          |
|          |            | {Ch-Ch} | 39.30                | 1455672 | 2.31      |          |
| 3        | 420        | {16-16} | 15.06                | 1045646 | 2.19      | 9.36     |
|          |            | {Ch-16} | 22.57                | 3717346 | 6.99      |          |
|          |            | {Ch-Ch} | 39.42                | 1503153 | 2.39      |          |
| 4        | 480        | {16-16} | 15.09                | 894389  | 1.87      | 9.70     |
|          |            | {Ch-16} | 22.65                | 3204475 | 6.03      |          |
|          |            | {Ch-Ch} | 39.45                | 1276001 | 2.00      |          |

**Table SI-43:** *K* values for homodimer equilibration # 2 in 40 mol % sterol LUVs in the presence of CHCl<sub>3</sub>. The reaction was carried out at 45 °C.

| Sample # | Time (min) | Dimer   | t <sub>R</sub> (min) | Area    | N (nmols) | <i>K</i> |
|----------|------------|---------|----------------------|---------|-----------|----------|
| 1        | 720        | {16-16} | 13.51                | 734195  | 1.54      | 5.85     |
|          |            | {Ch-16} | 20.67                | 1971606 | 3.72      |          |
|          |            | {Ch-Ch} | 37.73                | 1001304 | 1.54      |          |
| 2        | 720        | {16-16} | 13.51                | 758561  | 1.59      | 6.20     |
|          |            | {Ch-16} | 20.71                | 2066349 | 3.90      |          |
|          |            | {Ch-Ch} | 37.76                | 1003425 | 1.54      |          |
| 3        | 720        | {16-16} | 13.59                | 752450  | 1.57      | 6.06     |
|          |            | {Ch-16} | 20.80                | 2083062 | 3.93      |          |
|          |            | {Ch-Ch} | 37.95                | 1048032 | 1.62      |          |
| 4        | 720        | {16-16} | 13.66                | 766647  | 1.60      | 6.04     |
|          |            | {Ch-16} | 20.88                | 2083556 | 3.93      |          |
|          |            | {Ch-Ch} | 38.04                | 1034413 | 1.59      |          |

**Table SI-44:** *K* values for homodimer equilibration # 3 in 40 mol % sterol LUVs in the presence of CHCl<sub>3</sub>. The reaction was carried out at 45 °C.

| Sample # | Time (min) | Dimer   | t <sub>R</sub> (min) | Area    | N (nmols) | <i>K</i> |
|----------|------------|---------|----------------------|---------|-----------|----------|
| 1        | 720        | {16-16} | 13.80                | 717393  | 1.50      | 6.17     |
|          |            | {Ch-16} | 21.11                | 1948631 | 3.68      |          |
|          |            | {Ch-Ch} | 38.35                | 953608  | 1.46      |          |
| 2        | 720        | {16-16} | 13.68                | 728273  | 1.52      | 5.87     |
|          |            | {Ch-16} | 20.94                | 1950143 | 3.68      |          |
|          |            | {Ch-Ch} | 38.10                | 986841  | 1.51      |          |
| 3        | 720        | {16-16} | 13.82                | 771011  | 1.61      | 6.19     |
|          |            | {Ch-16} | 21.16                | 2112253 | 3.98      |          |
|          |            | {Ch-Ch} | 38.49                | 1031402 | 1.59      |          |
| 4        | 720        | {16-16} | 13.93                | 824919  | 1.73      | 5.92     |
|          |            | {Ch-16} | 21.30                | 2179289 | 4.11      |          |
|          |            | {Ch-Ch} | 38.67                | 1067759 | 1.65      |          |

**Table SI-45:** Overall  $K$  values for 40 mol % sterol LUVs (45 °C).

|                      | $K$ values      |                 |                 |
|----------------------|-----------------|-----------------|-----------------|
|                      | Hetero          | Homo            | Cumulative      |
| No $\text{CHCl}_3$   | $9.20 \pm 0.33$ | $8.84 \pm 0.54$ | $9.02 \pm 0.48$ |
| With $\text{CHCl}_3$ | $6.02 \pm 0.28$ | $5.91 \pm 0.13$ | $5.97 \pm 0.22$ |

**1.2.2.5.  $K$  values for 2.5 mol % Sterol LUVs at 35 °C****Table SI-46:**  $K$  values for heterodimer equilibration in 2.5 mol % sterol LUVs in the absence of  $\text{CHCl}_3$ . The reaction was carried out at 35 °C.

| Sample # | Time (h) | Dimer   | $t_R$ (min) | Area    | N (nmols) | $K$  |
|----------|----------|---------|-------------|---------|-----------|------|
| 1        | 23.5     | {16-16} | 11.70       | 2304761 | 4.82      | 1.11 |
|          |          | {Ch-16} | 18.10       | 3223298 | 6.04      |      |
|          |          | {Ch-Ch} | 34.20       | 4047989 | 6.84      |      |
| 2        | 36       | {16-16} | 11.70       | 2532808 | 5.30      | 0.83 |
|          |          | {Ch-16} | 18.20       | 2975023 | 5.58      |      |
|          |          | {Ch-Ch} | 34.30       | 4183737 | 7.07      |      |
| 3        | 48       | {16-16} | 11.70       | 2718838 | 5.69      | 0.77 |
|          |          | {Ch-16} | 18.20       | 3104934 | 5.82      |      |
|          |          | {Ch-Ch} | 34.30       | 4561352 | 7.71      |      |
| 4        | 60.5     | {16-16} | 11.70       | 2736919 | 5.72      | 0.81 |
|          |          | {Ch-16} | 18.20       | 3210261 | 6.02      |      |
|          |          | {Ch-Ch} | 34.30       | 4597255 | 7.77      |      |
| 5        | 71       | {16-16} | 11.80       | 2330710 | 4.87      | 0.80 |
|          |          | {Ch-16} | 18.30       | 2633809 | 4.94      |      |
|          |          | {Ch-Ch} | 34.30       | 3702102 | 6.25      |      |

**Table SI-47:**  $K$  values for homodimer equilibration in 2.5 mol % sterol LUVs in the absence of  $\text{CHCl}_3$ . The reaction was carried out at 35 °C.

| Sample # | Time (h) | Dimer   | $t_R$ (min) | Area    | N (nmols) | $K$  |
|----------|----------|---------|-------------|---------|-----------|------|
| 1        | 23.5     | {16-16} | 11.70       | 3498259 | 7.32      | 0.71 |
|          |          | {Ch-16} | 18.20       | 3503905 | 6.57      |      |
|          |          | {Ch-Ch} | 34.40       | 4913367 | 8.30      |      |
| 2        | 36       | {16-16} | 11.70       | 3480692 | 7.28      | 0.73 |
|          |          | {Ch-16} | 18.30       | 3544185 | 6.64      |      |
|          |          | {Ch-Ch} | 34.40       | 4910501 | 8.30      |      |
| 3        | 48       | {16-16} | 11.80       | 3766461 | 7.88      | 0.75 |
|          |          | {Ch-16} | 18.30       | 3852253 | 7.22      |      |
|          |          | {Ch-Ch} | 34.50       | 5197423 | 8.78      |      |
| 4        | 60.5     | {16-16} | 11.80       | 3514012 | 7.35      | 0.76 |
|          |          | {Ch-16} | 18.30       | 3647295 | 6.84      |      |
|          |          | {Ch-Ch} | 34.60       | 4939747 | 8.35      |      |
| 5        | 71       | {16-16} | 11.80       | 3372182 | 7.05      | 0.75 |
|          |          | {Ch-16} | 18.40       | 3498658 | 6.56      |      |
|          |          | {Ch-Ch} | 34.60       | 4801447 | 8.11      |      |

**Table SI-48:** *K* values for heterodimer equilibration in 2.5 mol % sterol LUVs in the presence of CHCl<sub>3</sub>. The reaction was carried out at 35 °C.

| Sample # | Time (h) | Dimer   | t <sub>R</sub> (min) | Area    | N (nmols) | <i>K</i> |
|----------|----------|---------|----------------------|---------|-----------|----------|
| 1        | 24       | {16-16} | 11.50                | 1734778 | 3.63      | 5.30     |
|          |          | {Ch-16} | 17.70                | 4478747 | 8.39      |          |
|          |          | {Ch-Ch} | 33.70                | 2167626 | 3.66      |          |
| 2        | 24       | {16-16} | 11.40                | 1798808 | 3.76      | 5.28     |
|          |          | {Ch-16} | 17.60                | 4699242 | 8.81      |          |
|          |          | {Ch-Ch} | 33.60                | 2311252 | 3.90      |          |
| 3        | 24       | {16-16} | 11.50                | 1887749 | 3.95      | 5.32     |
|          |          | {Ch-16} | 17.70                | 4935550 | 9.25      |          |
|          |          | {Ch-Ch} | 37.70                | 2412717 | 4.08      |          |

**Table SI-49:** *K* values for homodimer equilibration in 2.5 mol % sterol LUVs in the presence of CHCl<sub>3</sub>. The reaction was carried out at 35 °C.

| Sample # | Time (h) | Dimer   | t <sub>R</sub> (min) | Area    | N (nmols) | <i>K</i> |
|----------|----------|---------|----------------------|---------|-----------|----------|
| 1        | 24       | {16-16} | 11.60                | 2060895 | 4.31      | 5.15     |
|          |          | {Ch-16} | 17.80                | 5299859 | 9.93      |          |
|          |          | {Ch-Ch} | 34.00                | 2633420 | 4.45      |          |
| 2        | 24       | {16-16} | 11.60                | 2041855 | 4.27      | 5.35     |
|          |          | {Ch-16} | 17.90                | 5451047 | 10.22     |          |
|          |          | {Ch-Ch} | 34.10                | 2705757 | 4.57      |          |
| 3        | 24       | {16-16} | 11.70                | 2060632 | 4.31      | 5.16     |
|          |          | {Ch-16} | 18.00                | 5335069 | 10.00     |          |
|          |          | {Ch-Ch} | 34.20                | 2662763 | 4.50      |          |

**Table SI-50:** Overall *K* values for 2.5 mol % sterol LUVs (35 °C).

|                        | <i>K</i> values |             |             |
|------------------------|-----------------|-------------|-------------|
|                        | Hetero          | Homo        | Cumulative  |
| No CHCl <sub>3</sub>   | 0.80 ± 0.02     | 0.75 ± 0.01 | 0.78 ± 0.03 |
| With CHCl <sub>3</sub> | 5.30 ± 0.02     | 5.22 ± 0.11 | 5.26 ± 0.09 |

## 2. Estimation of CHCl<sub>3</sub> Binding to 200 nm LUVs with Varying Sterol Content

In these experiments, the binding of CHCl<sub>3</sub> at 45 °C to 2.5, 20, and 40 mol % sterol containing 200 nm LUVs was determined using gas chromatography (GC).

### 2.1. Calibration for CHCl<sub>3</sub> Determination

The GC analysis was done using a Hewlett-Packard 5890 series gas chromatograph equipped with a thermal conductivity detector and a Supelco Vocol capillary fused silica GC column (30 m X 0.53 mm X 3 µl film thickness). The GC was controlled using a PC running HP ChemStation. The following GC

parameters were employed: Detector: 230 °C (TCD); Injection Port: 230 °C; Oven: 35 °C (isothermal); Flow rate: 5 ml/min; Eluent Gas: Helium; Injection Volume: 0.2-0.5 µl; Analysis Time Per Sample: 8 minutes. **Standard Solution A:** 0.2 ml of CHCl<sub>3</sub>, 10 ml of EtOH, and 39.8 ml of Tris buffer (pH 7.4). **Standard Solution B:** 0.1 ml of CHCl<sub>3</sub>, 10 ml of EtOH, and 39.9 ml of Tris buffer (pH 7.4).. Calibration data are given in Table SI-51 and the calibration graph is reproduced in Figure SI-5. The data fit the following equation:  $y = 149.46x + 120.93$  ( $R^2 = 0.9926$ )

**Table SI-51:** GC calibration data for CHCl<sub>3</sub> determination.

| #  | Sln. | Inj. Vol.<br>(µl) | N <sub>CHCl<sub>3</sub></sub><br>(nmol) | t <sub>R</sub><br>(min) | Area   | Av.<br>Area | St. Dev.<br>(±) | % St. Dev.<br>(±) |
|----|------|-------------------|-----------------------------------------|-------------------------|--------|-------------|-----------------|-------------------|
| 1  | A    | 0.5               | 25                                      | 5.91                    | 3837.9 | 3852.8      | 35.42           | 0.92              |
| 2  | A    | 0.5               | 25                                      | 5.92                    | 3831.0 |             |                 |                   |
| 3  | A    | 0.5               | 25                                      | 5.90                    | 3899.6 |             |                 |                   |
| 4  | A    | 0.5               | 25                                      | 5.85                    | 3815.5 |             |                 |                   |
| 5  | A    | 0.5               | 25                                      | 5.89                    | 3880.0 |             |                 |                   |
| 6  | A    | 0.4               | 20                                      | 5.89                    | 3259.5 | 3106.0      | 117.88          | 3.80              |
| 7  | A    | 0.4               | 20                                      | 5.88                    | 2974.0 |             |                 |                   |
| 8  | A    | 0.4               | 20                                      | 5.88                    | 3008.7 |             |                 |                   |
| 9  | A    | 0.4               | 20                                      | 5.90                    | 3177.5 |             |                 |                   |
| 10 | A    | 0.4               | 20                                      | 5.90                    | 3110.5 |             |                 |                   |
| 11 | A    | 0.3               | 15                                      | 5.93                    | 2224.1 | 2405.1      | 165.43          | 6.88              |
| 12 | A    | 0.3               | 15                                      | 5.94                    | 2236.7 |             |                 |                   |
| 13 | A    | 0.3               | 15                                      | 5.92                    | 2460.0 |             |                 |                   |
| 14 | A    | 0.3               | 15                                      | 5.90                    | 2521.0 |             |                 |                   |
| 15 | A    | 0.3               | 15                                      | 5.92                    | 2583.7 |             |                 |                   |
| 16 | B    | 0.4               | 10                                      | 5.94                    | 1581.8 | 1566.5      | 67.17           | 4.29              |
| 17 | B    | 0.4               | 10                                      | 5.95                    | 1518.9 |             |                 |                   |
| 18 | B    | 0.4               | 10                                      | 5.96                    | 1657.4 |             |                 |                   |
| 19 | B    | 0.4               | 10                                      | 5.96                    | 1484.4 |             |                 |                   |
| 20 | B    | 0.4               | 10                                      | 5.96                    | 1589.8 |             |                 |                   |
| 21 | B    | 0.3               | 7.5                                     | 6.00                    | 1089.6 | 1234.1      | 85.85           | 6.96              |
| 22 | B    | 0.3               | 7.5                                     | 6.00                    | 1298.6 |             |                 |                   |
| 23 | B    | 0.3               | 7.5                                     | 5.99                    | 1262.7 |             |                 |                   |
| 24 | B    | 0.3               | 7.5                                     | 6.01                    | 1293.7 |             |                 |                   |
| 25 | B    | 0.3               | 7.5                                     | 6.06                    | 1225.8 |             |                 |                   |
| 26 | B    | 0.2               | 5                                       | 6.06                    | 900.3  | 891.9       | 37.66           | 4.22              |
| 27 | B    | 0.2               | 5                                       | 6.12                    | 848.2  |             |                 |                   |
| 28 | B    | 0.2               | 5                                       | 6.01                    | 869.8  |             |                 |                   |
| 29 | B    | 0.2               | 5                                       | 6.09                    | 948.5  |             |                 |                   |
| 30 | B    | 0.2               | 5                                       | 6.12                    | 892.5  |             |                 |                   |

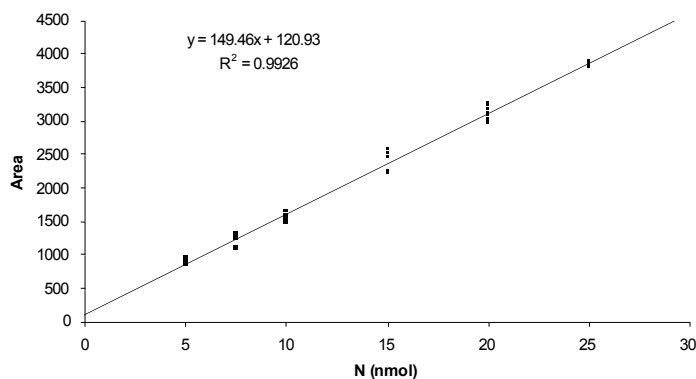

**Figure SI-5:** Linear regression data for GC calibration.

## 2.2. Determination of $\text{CHCl}_3$ Binding to LUVs

### 2.2.1. Vesicle Preparation

The amounts of lipids in Table SI-52 were used for film preparation. The given volumes of DPPC, DPPG, and cholesterol solutions were placed in a 13 x 100 mm test tube. The solvent was evaporated under a stream of Argon while the test tube was rapidly rotated at an angle of approximately  $10^\circ$  with respect to a flat horizontal surface at  $\sim 40^\circ\text{C}$ . A thin film was obtained which covered the inner surface of the test tube up to 1/2 of the height of the tube. A silicone septum was used to cover the mouth of the tube. The tube was sealed with parafilm, and covered with aluminum foil. The assembly was connected to a vacuum pump via a needle and kept under vacuum ( $\sim 0.2$  torr) overnight ( $\sim 14$  h).

**Table SI-52:** Lipids used in film preparation

| Lipid       | Conc. (mM) | 40% Sterol             |                           | 20% Sterol             |                           | 2.5% Sterol            |                           |
|-------------|------------|------------------------|---------------------------|------------------------|---------------------------|------------------------|---------------------------|
|             |            | Vol. ( $\mu\text{l}$ ) | Moles ( $\mu\text{mol}$ ) | Vol. ( $\mu\text{l}$ ) | Moles ( $\mu\text{mol}$ ) | Vol. ( $\mu\text{l}$ ) | Moles ( $\mu\text{mol}$ ) |
| DPPC        | 27.2       | 846                    | 23                        | 1140                   | 31                        | 1397                   | 38                        |
| DPPG        | 13.6       | 74                     | 1                         | 74                     | 1                         | 74                     | 1                         |
| Cholesterol | 20         | 800                    | 16                        | 400                    | 8                         | 50                     | 1                         |

The lipid film was hydrated with 2 ml pH 7.4 Tris buffer at  $60^\circ\text{C}$  and the mixture was vortexed for 30 s. The mixture was then rested 5 min in a  $60^\circ\text{C}$  water bath. The mixture was again vortexed for 30 s followed by a 30 min rest in a  $60^\circ\text{C}$  water bath. The mixture was then subjected to six freeze/thaw cycles as follows: The test tube was repeatedly immersed in liquid  $\text{N}_2$  and then vortexed until a homogeneous thin layer of ice covered the inner surface of the tube. When all of the liquid was frozen the tube was immersed in liquid  $\text{N}_2$  until rapid bubble evolution ( $\text{N}_2$ ) in the bath ceased. The tube was then immersed in a  $60^\circ\text{C}$  water bath until the frozen MLV mixture melted and heated to  $60^\circ\text{C}$ . This freeze/thaw cycle was repeated five more times. The MLVs were extruded using a Lipex extruder with an argon pressure of 100 psi. Extrusion was done at  $60^\circ\text{C}$ . The MLVs were extruded 10 times through  $0.2\ \mu\text{m}$  polycarbonate filters.

### 2.2.2. Determination of the Extend of $\text{CHCl}_3$ Binding

A given dispersion (1 ml) was placed in a 3 ml reaction vessel (Wheaton PN: 986287) equipped with a small magnetic stir bar, silicone septum (Aldrich, PN: Z512893), and a small test tube for  $\text{CHCl}_3$  (Figure SI-2). A reaction similarly configured containing only buffer acted as the control. The reaction vessels were heated to  $45^\circ\text{C}$  and  $21\ \mu\text{l}$  0.1 M NaOH was added to each vessel.  $250\ \mu\text{l}$   $\text{CHCl}_3$  was placed into the test tube within each reaction vessel. An additional  $200\ \mu\text{l}$   $\text{CHCl}_3$  was added to each vessel six hours after the experiment started.  $0.3\ \mu\text{l}$  aliquots were withdrawn from each reaction vessel after 12-14 h and analyzed using GC.

**Table SI-53:**  $\text{N}_{\text{CHCl}_3}$  found in  $0.3\ \mu\text{l}$  buffer.

| Entry #                            | 1                | 2      | 3      | 4      | 5      |
|------------------------------------|------------------|--------|--------|--------|--------|
| Reaction #                         | 1                | 1      | 1      | 2      | 2      |
| $t_R$ (min)                        | 6.27             | 6.25   | 6.28   | 6.26   | 6.32   |
| Area                               | 3776.9           | 3437.2 | 3205.0 | 3288.8 | 3958.8 |
| $\text{N}_{\text{CHCl}_3}$ (nmol)  | 24.46            | 22.19  | 20.63  | 21.20  | 25.68  |
| Average $\text{N}_{\text{CHCl}_3}$ | $22.83 \pm 2.16$ |        |        |        |        |

**Table SI-54:** N<sub>CHCl<sub>3</sub></sub> found in 0.3 µl 40% sterol LUV dispersion.

| Entry #                               | 1            | 2      | 3      | 4      | 5      |
|---------------------------------------|--------------|--------|--------|--------|--------|
| Reaction #                            | 1            | 1      | 1      | 2      | 2      |
| t <sub>R</sub> (min)                  | 6.28         | 6.29   | 6.23   | 6.32   | 6.31   |
| Area                                  | 4674.4       | 4811.3 | 4757.4 | 4806.6 | 5255.2 |
| N <sub>CHCl<sub>3</sub></sub> (nmol)  | 30.47        | 31.38  | 31.02  | 31.35  | 34.35  |
| Average N <sub>CHCl<sub>3</sub></sub> | 31.71 ± 1.52 |        |        |        |        |

**Table SI-55:** N<sub>CHCl<sub>3</sub></sub> found in 0.3 µl 20% sterol LUV dispersion.

| Entry #                               | 1            | 2      | 3      | 4      | 5      |
|---------------------------------------|--------------|--------|--------|--------|--------|
| Reaction #                            | 1            | 1      | 1      | 2      | 2      |
| t <sub>R</sub> (min)                  | 6.25         | 6.26   | 6.23   | 6.25   | 6.33   |
| Area                                  | 5478.4       | 5734.6 | 5694.9 | 5823.8 | 5792.2 |
| N <sub>CHCl<sub>3</sub></sub> (nmol)  | 35.85        | 37.56  | 37.29  | 38.16  | 37.95  |
| Average N <sub>CHCl<sub>3</sub></sub> | 37.36 ± 0.91 |        |        |        |        |

**Table SI-56:** N<sub>CHCl<sub>3</sub></sub> found in 0.3 µl 2.5% sterol LUV dispersion.

| Entry #                               | 1            | 2      | 3      | 4      | 5      |
|---------------------------------------|--------------|--------|--------|--------|--------|
| Reaction #                            | 1            | 1      | 1      | 2      | 2      |
| t <sub>R</sub> (min)                  | 6.26         | 6.27   | 6.26   | 6.24   | 6.33   |
| Area                                  | 6650.7       | 6539.5 | 6218.7 | 5745.1 | 6211.7 |
| N <sub>CHCl<sub>3</sub></sub> (nmol)  | 43.69        | 42.95  | 40.80  | 37.63  | 40.75  |
| Average N <sub>CHCl<sub>3</sub></sub> | 41.16 ± 2.36 |        |        |        |        |

**Table SI-57:** Binding of CHCl<sub>3</sub> to LUVs with varying sterol levels<sup>a</sup>

| LUV          | ΔN <sub>CHCl<sub>3</sub></sub><br>(nmol) | [CHCl <sub>3</sub> ]<br>(mM) | [Lipid]<br>(mM) | [DPPC]<br>(mM) | $\frac{[CHCl_3]}{[Lipid]}$ | $\frac{[CHCl_3]}{[DPPC]}$ |
|--------------|------------------------------------------|------------------------------|-----------------|----------------|----------------------------|---------------------------|
| 40% Sterol   | 8.88                                     | 29.61                        | 20.00           | 12.00          | 1.48                       | 2.47                      |
| 20% Sterol   | 14.53                                    | 48.43                        | 20.00           | 16.00          | 2.42                       | 3.03                      |
| 2.5 % Sterol | 18.33                                    | 61.10                        | 20.00           | 19.75          | 3.06                       | 3.09                      |

<sup>a</sup>ΔN<sub>CHCl<sub>3</sub></sub> is the difference of the CHCl<sub>3</sub> amounts found in the corresponding LUV aliquots and buffer aliquots; [CHCl<sub>3</sub>] is CHCl<sub>3</sub> concentration within or directly associated the lipid bilayer.

### 2.3. Effect of CHCl<sub>3</sub> on Vesicle Size

The effect of CHCl<sub>3</sub> on vesicle size was investigated using a Nicomp DLS submicron sizer. Aliquots (15 µl) were taken from each dispersion before and after treatment with CHCl<sub>3</sub> (at ~ 14 h). These aliquots were diluted with 335 µl tris buffer and analyzed at 45 °C. A sample viscosity of 0.5960 centipoise was assumed. Relevant data are given in Table SI-58. A broad monomodal distribution was observed in all cases.

**Table SI-58:** Vesicle size before and after treatment with CHCl<sub>3</sub> as determined by DLS.

| LUV         | t = 0 (no CHCl <sub>3</sub> ) |                        | T = 12-14 h (with CHCl <sub>3</sub> ) |                        |
|-------------|-------------------------------|------------------------|---------------------------------------|------------------------|
|             | Average Diameter (nm)         | Standard Deviation (%) | Average Diameter (nm)                 | Standard Deviation (%) |
| 40% Sterol  | 186.7                         | 42                     | 194.2                                 | 37                     |
| 20% Sterol  | 190.2                         | 28                     | 211.1                                 | 33                     |
| 2.5% Sterol | 179.6                         | 26                     | 202.8                                 | 30                     |

### 3. General Polarization Experiments

#### 3.1. Method

2.5 (95:2.5:2.5 DPPC:DPPG:Cholesterol) and 40 (57.5:2.5:40 DPPC:DPPG:Cholesterol) mol% sterol liposomes (~200 nm, 1.2 mM total lipid concentration) containing or lacking laurdan (ANASpec, 0.5 mol%, added during lipid film preparation) were prepared as described in section 1.1.1. The pH of the dispersions was adjusted to 7.4 at 45 °C and the vesicles were incubated in the presence and absence of  $\text{CHCl}_3$  for 12 hours at 45 °C (Figure SI-2). The vesicle dispersions were placed in capped fluorescence cuvettes and the fluorescence of each sample was measured as a function of temperature using a Perkin Elmer LS50B Luminescence Spectrometer employing a temperature controlled cell holder.  $\lambda_{\text{ex}}$  was 350 nm and a 2.5 nm slit width was used. Fluorescence emissions were recorded from 350 to 600 nm. The effect of scattering due to liposomes was corrected for by subtracting the fluorescence spectra of liposomes lacking laurdan from those that contained laurdan. General Polarization (GP) was calculated using the following equation:

$$GP = \frac{(I_{440} - I_{490})}{(I_{440} + I_{490})}$$

where  $I_{440}$  and  $I_{490}$  are fluorescence emission intensities at 440 and 490 nm respectively. In addition to fluorescence experiments involving liposomes, the fluorescence of laurdan in a number of organic solvents was also measured.

#### 3.2. Results

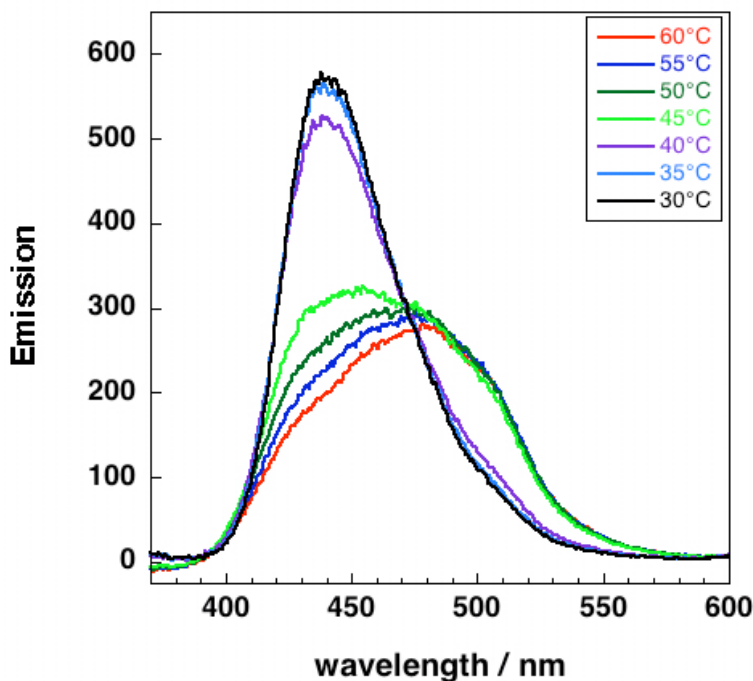

**Figure SI-6:** Fluorescence spectra for 2.5 mol% sterol liposomes in the absence of  $\text{CHCl}_3$ .

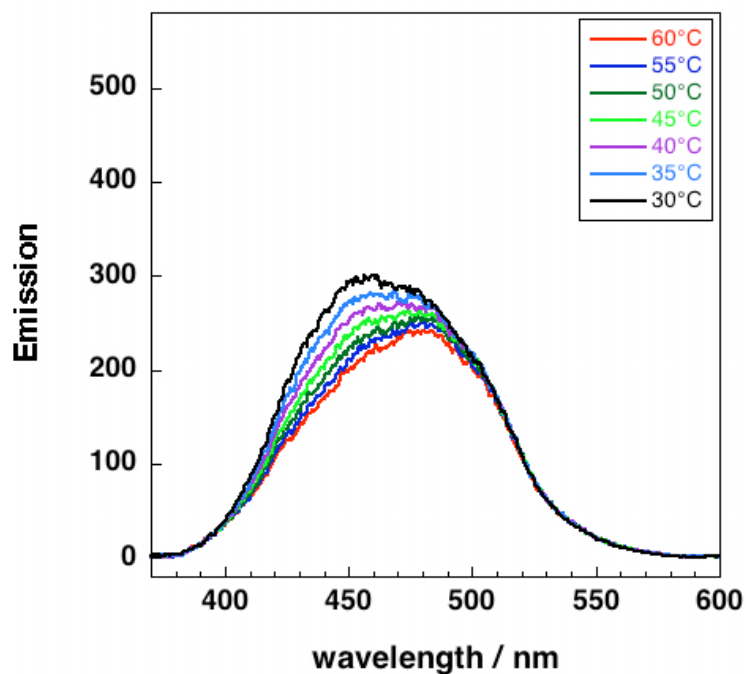

**Figure SI-7:** Fluorescence spectra for 2.5 mol% sterol liposomes in the presence of  $\text{CHCl}_3$ .

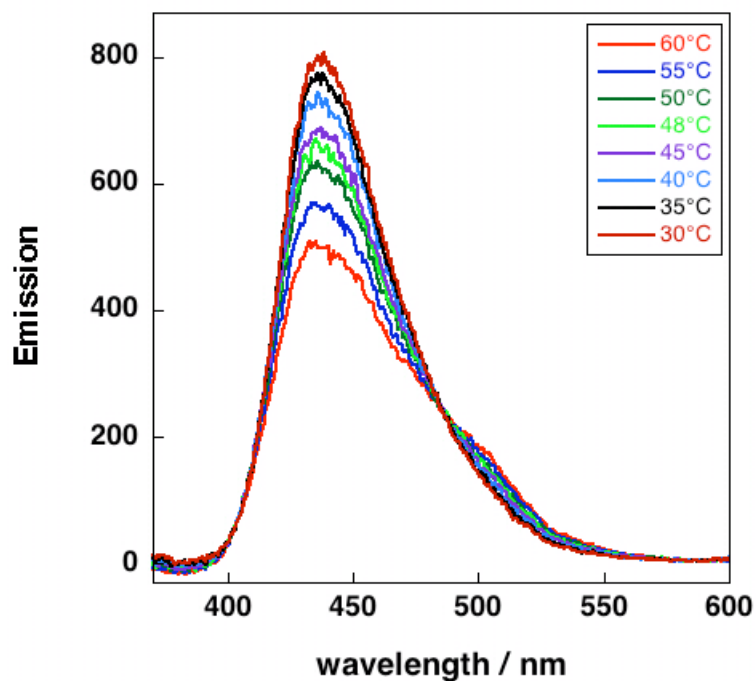

**Figure SI-8:** Fluorescence spectra for 40 mol% sterol liposomes in the absence of  $\text{CHCl}_3$ .

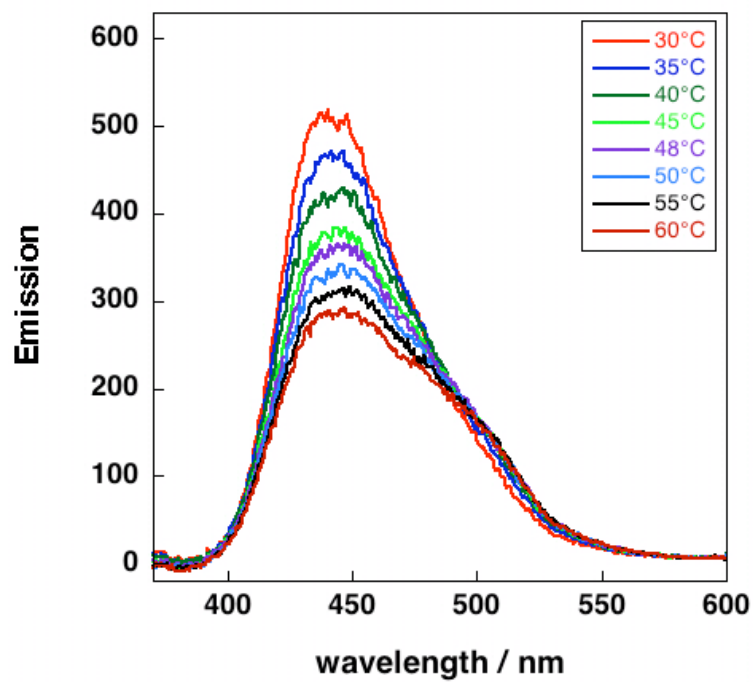

**Figure SI-9:** Fluorescence spectra for 40 mol% sterol liposomes in the presence of  $\text{CHCl}_3$ .

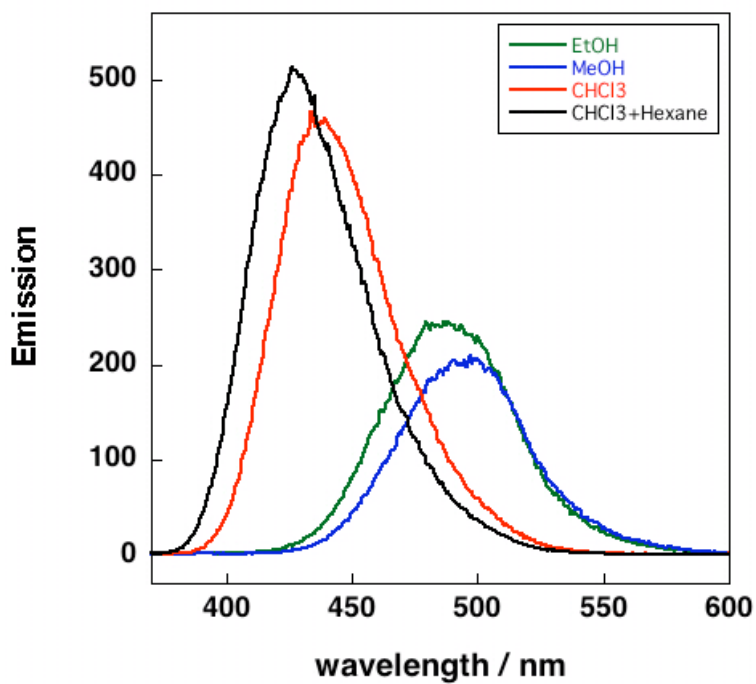

**Figure SI-10:** Fluorescence spectra for laurdan in various organic solvents.

**Table SI-59:** GP values for 2.5 and 40 mol% sterol liposomes in the absence and presence of CHCl<sub>3</sub>.

| Temperature<br>(°C) | General Polarization      |                        |                           |                        |
|---------------------|---------------------------|------------------------|---------------------------|------------------------|
|                     | 2.5 mol% Sterol           |                        | 40 mol% Sterol            |                        |
|                     | without CHCl <sub>3</sub> | with CHCl <sub>3</sub> | without CHCl <sub>3</sub> | with CHCl <sub>3</sub> |
| 30.0                | 0.569                     | 0.018                  | 0.574                     | 0.472                  |
| 34.4                | 0.554                     | -0.019                 | 0.554                     | 0.397                  |
| 38.5                | 0.503                     | -0.046                 | 0.540                     | 0.330                  |
| 43.0                | 0.086                     | -0.087                 | 0.501                     | 0.287                  |
| 45.0                | -                         | -0.086                 | 0.490                     | 0.262                  |
| 46.8                | -0.002                    | -0.096                 | 0.468                     | 0.232                  |
| 50.9                | -0.076                    | -0.142                 | 0.434                     | 0.233                  |
| 55.1                | -0.118                    | -0.142                 | 0.391                     | 0.190                  |

**Table SI-60:** GP values for laurdan in various organic solvents.

| Entry | Solvent                         | GP     |
|-------|---------------------------------|--------|
| 1     | MeOH                            | -0.737 |
| 2     | EtOH                            | -0.838 |
| 3     | CHCl <sub>3</sub>               | 0.661  |
| 4     | CHCl <sub>3</sub> :Hexane (1:1) | 0.760  |

## 4. Raman Spectra

### 4.1. Method

Lipid films for 2.5 (204.35  $\mu\text{mol}$  DPPC, 5.38  $\mu\text{mol}$  DPPG, 5.38  $\mu\text{mol}$  cholesterol-95:2.5:2.5 mole ratio) and 40 (123.69  $\mu\text{mol}$  DPPC, 5.38  $\mu\text{mol}$  DPPG, 86.04  $\mu\text{mol}$  cholesterol-57.5:2.5:40 mole ratio) mol% sterol vesicles were prepared. These films were hydrated using 8 ml pH 7.4 Tris buffer and subjected to manipulations outlined in section 1.1.1. The resulting LUV dispersions were placed in centrifuge tubes (Nalgene, PN:3139-0016) and were centrifuged at 48000g (20000 rpm) using a Beckman Avanti J-25 centrifuge equipped with a JA-20 rotor for 105 min at 23 °C. The supernatant for each tube was decanted and the precipitate in each tube was resuspended in sufficient Tris buffer to give a final volume of ~ 1ml. The pH was adjusted to 7.4 at 45 °C. The dispersions were placed in stoppered quartz cuvettes (Starna Cells, PN 29/SOG/5). Raman spectra of these dispersions were taken at 48 °C using a HORIBA Jobin Yvon LabRAM-IR Raman Microscope equipped with a CCD detector. Excitation was done at 442 nm using a tunable laser and spectra were taken from 500 to 3000  $\text{cm}^{-1}$  (each spectrum an average of 20 15-second scans). The dispersions were then removed from the cuvettes and placed into reaction vessels (Figure SI-2) and incubated with CHCl<sub>3</sub> for 12 h at 45 °C. After this the vesicles were transferred back into the quartz cuvettes and Raman spectra were taken at 48 °C. Vesicle size was checked using DLS after each manipulation and the values found are given in Table SI-61.

**Table SI-61:** Effect of various manipulations on vesicle mean diameters.

| Entry | Process                          | Mean Diameter (nm) |                  |
|-------|----------------------------------|--------------------|------------------|
|       |                                  | 2.5 mol% Sterol    | 40 mol% Sterol   |
| 1     | Extrusion                        | 175.4 $\pm$ 61.4   | 172.1 $\pm$ 62.0 |
| 2     | Centrifugation/Resuspension      | 185.2 $\pm$ 57.4   | 182.5 $\pm$ 52.9 |
| 3     | Treatment with CHCl <sub>3</sub> | 182.0 $\pm$ 69.2   | 189.7 $\pm$ 64.5 |

## 4.2. Spectra

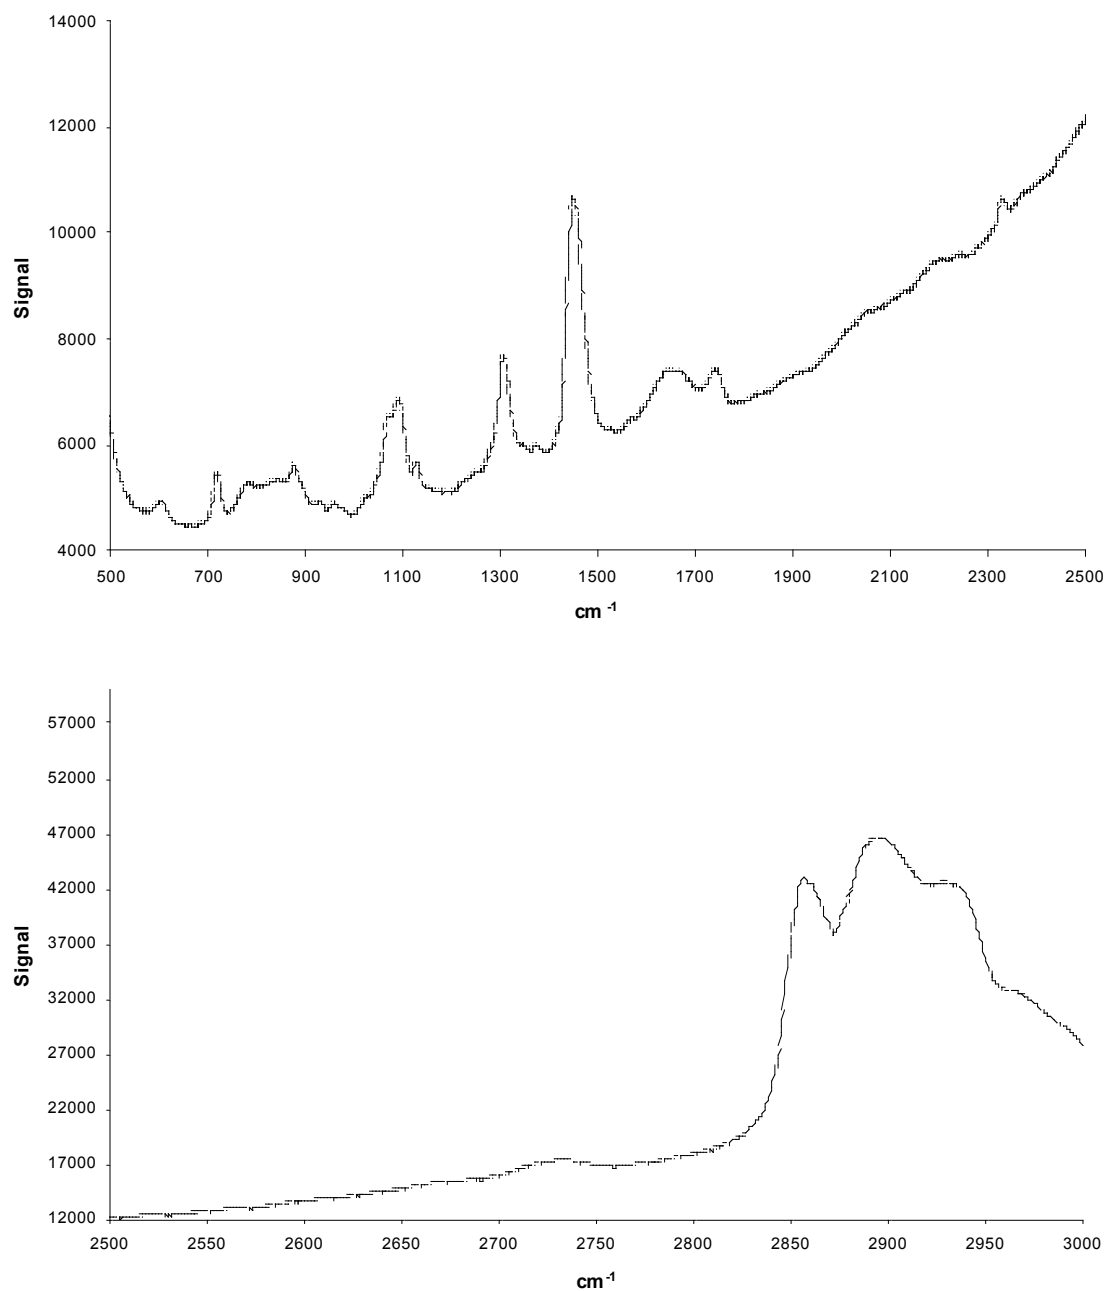

**Figure SI-11:** Raman spectrum for 2.5 mol% sterol LUVs in the absence of  $\text{CHCl}_3$  at 48  $^{\circ}\text{C}$  (500-2500  $\text{cm}^{-1}$  upper-hand, 2500-3000  $\text{cm}^{-1}$  lower-hand).

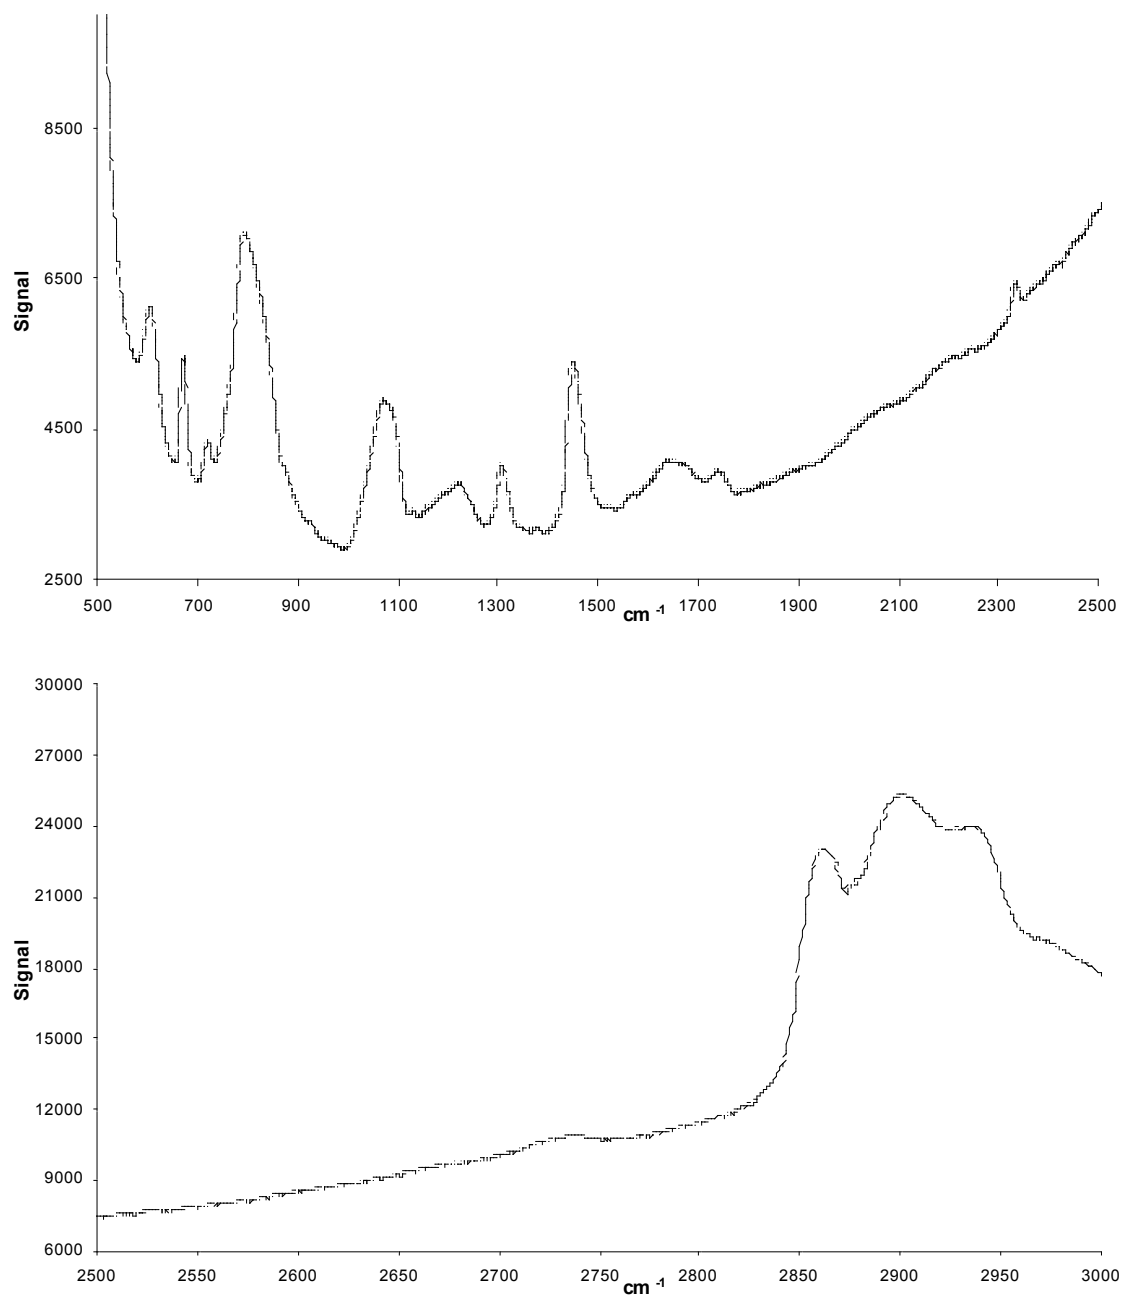

**Figure SI-12:** Raman spectrum for 2.5 mol% sterol LUVs in the presence of  $\text{CHCl}_3$  at 48 °C (500-2500  $\text{cm}^{-1}$  upper-hand, 2500-3000  $\text{cm}^{-1}$  lower-hand).

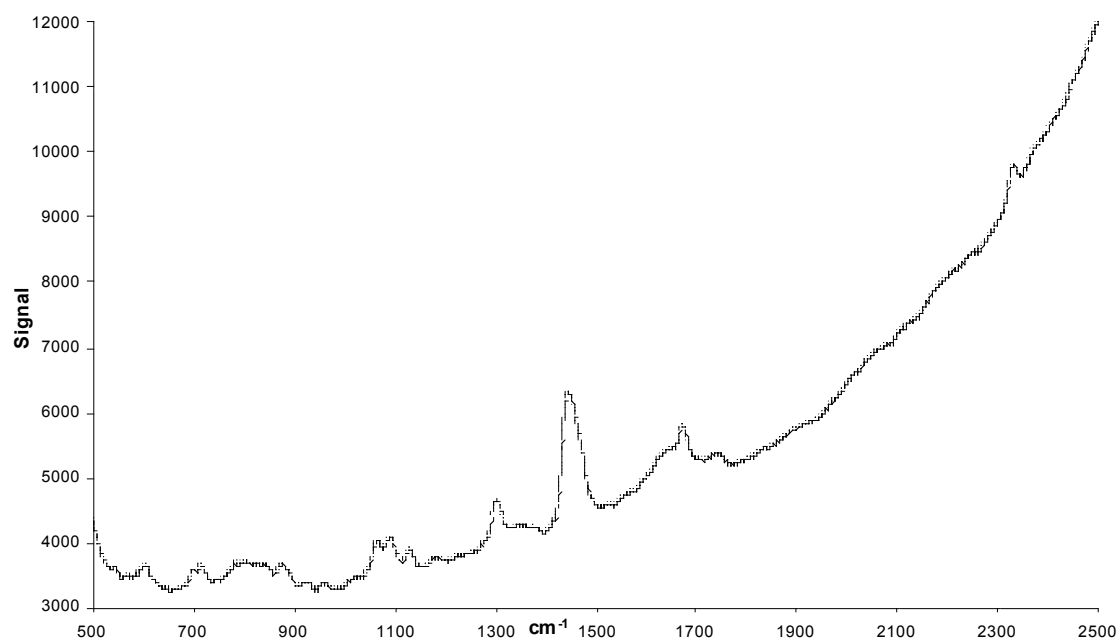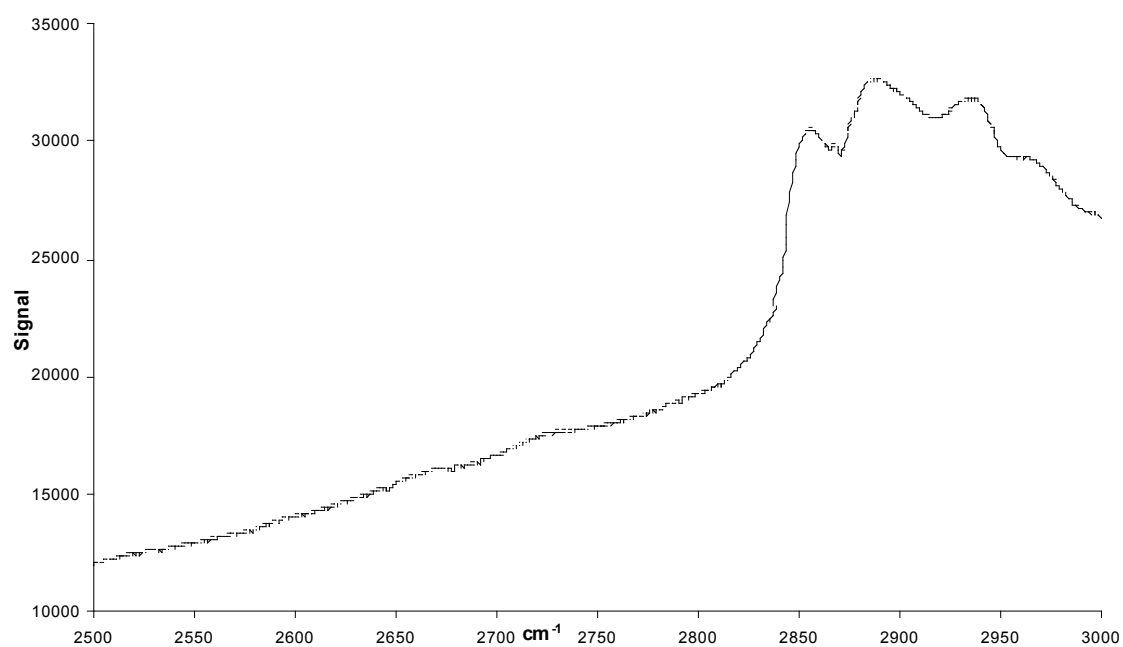

**Figure SI-13:** Raman spectrum for 40 mol% sterol LUVs in the absence of  $\text{CHCl}_3$  at  $48^\circ\text{C}$  (500-2500  $\text{cm}^{-1}$  upper-hand, 2500-3000  $\text{cm}^{-1}$  lower-hand).

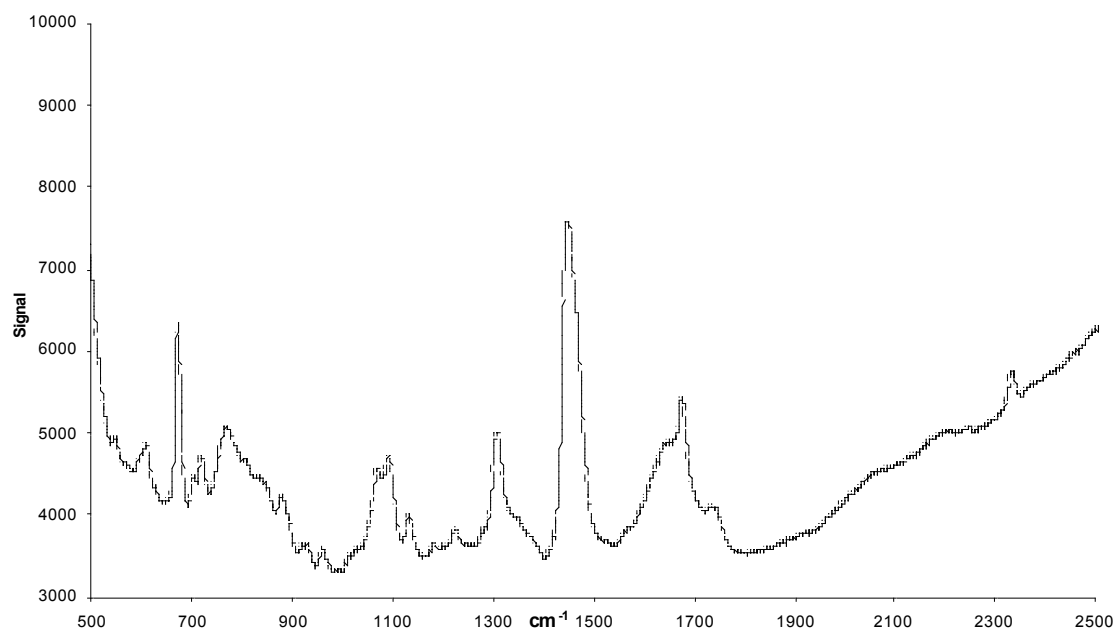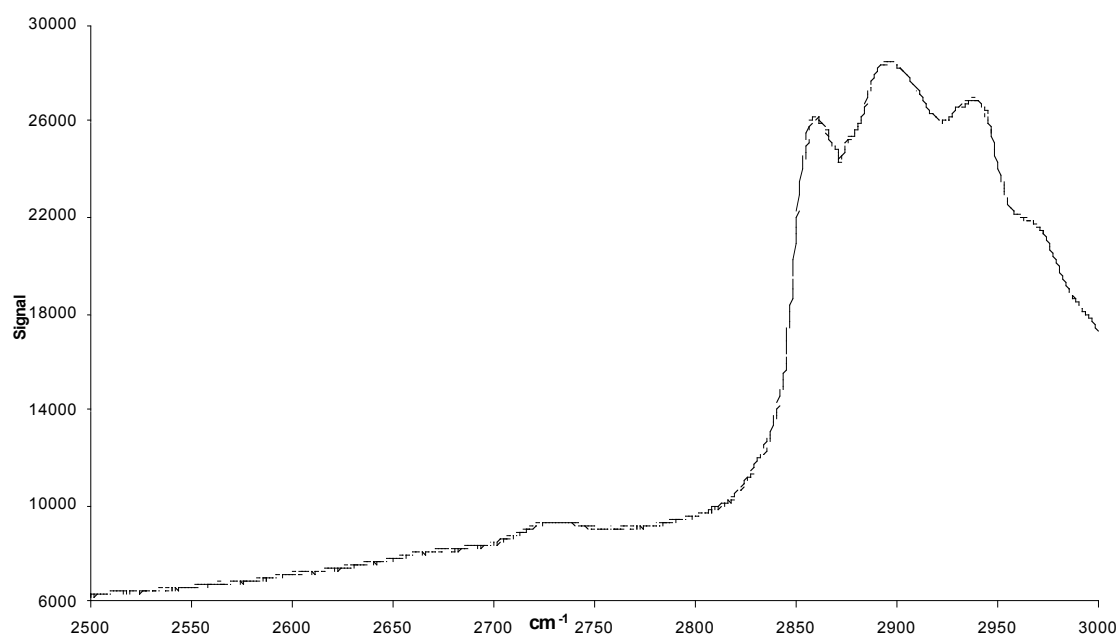

**Figure SI-14:** Raman spectrum for 40 mol% sterol LUVs in the presence of  $\text{CHCl}_3$  at 48 °C (500-2500  $\text{cm}^{-1}$  upper-hand, 2500-3000  $\text{cm}^{-1}$  lower-hand).
